# Supplementary material
Source: publisher figshare collection journal article supplement (https://acs.figshare.com/ndownloader/files/8876254)
Supplement: Supplementary file 1 [file 8876254]

## Sheet: Table S2
Table S2. Sensibility database
Experimental data from D. Mathieu and T. Alaime, J. Mol. Graph. Model. Vol. 62, pp. 81-86 (2015)
Computational data derived from present work.
Content of the columns:
Name = chemical name of the molecule
Abbrev. = popular abbrevation/acronym (used throughout the article)
Category = one of the six compound categories described in the article
Molecular formula
OB(CO2) = oxygen balance with respect to CO2
r0 = density
HGAS = gas-phase formation enthalpy
SUB0 = sublimation enthalpy
Q = heat of explosion
D = detonation velocity
P = detonation pressure
EG = Gurney energy
h50(calc) = drop weight impact height calculated using the present model
h50(obs) = drop weight impact height measured according to the ERL Type 12 procedure
SMILES = string encoding the molecular structure
Name	Abbrev.	Category	Molecular	OB(CO2)	r0	HGAS	HSUB	Q	D	P	EG	h50(calc)	h50(obs)	SMILES
4-picrylamino-1,2,3-triazole		Unst. (N2 loss)	C8H5N7O6	-67.8	1.719	382.3	185	5.05	7.203	223.8	4794	80	103	n1n[nH]cc1Nc1c(cc(cc1[N+](=O)[O-])[N+](=O)[O-])[N+](=O)[O-]
1-(3',5'-dinitrophenyl)-4-nitro-1,2,3-triazole		Unst. (N2 loss)	C8H4N6O6	-68.5	1.701	367	162	5.27	7.131	217.9	4623	52	56	n1c(cn(n1)c1cc(cc(c1)[N+](=O)[O-])[N+](=O)[O-])[N+](=O)[O-]
1-(3',4'-dinitrophenyl)-4-nitro-1,2,3-triazole		Unst. (N2 loss)	C8H4N6O6	-68.5	1.701	403.8	162	5.4	7.175	220.6	4739	52	51	n1c(cn(n1)c1ccc(c(c1)[N+](=O)[O-])[N+](=O)[O-])[N+](=O)[O-]
4,6-dinitro-1-picryl-benzotriazole		Unst. (N2 loss)	C12H4N8O10	-60.9	1.783	478.4	240	5.46	7.415	242.5	5016	39	40	c1(c2c(cc(c1)[N+](=O)[O-])n(nn2)c1c(cc(cc1[N+](=O)[O-])[N+](=O)[O-])[N+](=O)[O-])[N+](=O)[O-]
1-Picryl-5,7-dinitrobenzotriazole	BTX	Unst. (N2 loss)	C12H4N8O10	-60.9	1.783	455.3	240	5.41	7.396	241.3	4966	39	40	c1c(cc(c2c1nnn2c1c(cc(cc1[N+](=O)[O-])[N+](=O)[O-])[N+](=O)[O-])[N+](=O)[O-])[N+](=O)[O-]
1,5-dipicrylbenzo-[1,2-d:4,5-d']-bistriazole		Unst. (N2 loss)	C18H6N12O12	-74.2	1.768	894.1	319	5.27	7.139	223.6	4594	54	40	c1c2c(cc3c1n(nn3)c1c(cc(cc1[N+](=O)[O-])[N+](=O)[O-])[N+](=O)[O-])n(nn2)c1c(cc(cc1[N+](=O)[O-])[N+](=O)[O-])[N+](=O)[O-]
1,7-dipicrylbenzo-[1,2-d:4,5-d']-bistriazole		Unst. (N2 loss)	C18H6N12O12	-74.2	1.768	891	319	5.27	7.137	223.5	4589	54	38	c1c2c(cc3c1n(nn3)c1c(cc(cc1[N+](=O)[O-])[N+](=O)[O-])[N+](=O)[O-])nnn2c1c(cc(cc1[N+](=O)[O-])[N+](=O)[O-])[N+](=O)[O-]
5-picrylaminotetrazole		Unst. (tetrazole)	C7H4N8O6	-54	1.779	465.1	190	5.22	7.617	255.6	5454	64	36	n1nn[nH]c1Nc1c(cc(cc1[N+](=O)[O-])[N+](=O)[O-])[N+](=O)[O-]
5,6-dinitro-1-picryl-benzotriazole		Unst. (N2 loss)	C12H4N8O10	-60.9	1.783	494	240	5.5	7.428	243.3	5051	39	35	c12cc(c(cc1nnn2c1c(cc(cc1[N+](=O)[O-])[N+](=O)[O-])[N+](=O)[O-])[N+](=O)[O-])[N+](=O)[O-]
1-picryl-4-picrylamino-1,2,3-triazole		Unst. (N2 loss)	C14H6N10O12	-60	1.759	532.1	294	5.4	7.4	239.5	5030	52	35	n1c(cn(n1)c1c(cc(cc1[N+](=O)[O-])[N+](=O)[O-])[N+](=O)[O-])Nc1c(cc(cc1[N+](=O)[O-])[N+](=O)[O-])[N+](=O)[O-]
1-(3'-Amino-2',4',6'-trinitrophenyl)-1,2,3-triazole		Unst. (N2 loss)	C8H5N7O6	-67.8	1.729	411.3	179	5.17	7.274	229	4965	84	31	n1ccn(n1)c1c(cc(c(c1[N+](=O)[O-])N)[N+](=O)[O-])[N+](=O)[O-]
4-nitro-1,2,3-triazole		Unst. (N2 loss)	C2H2N4O2	-42.1	1.74	278.7	83	5.56	7.976	276.5	6198	26	25	c1nn[nH]c1[N+](=O)[O-]
2-Azido-1,3,5-trinitrobenzene	Picryl azide	Unst. (azide)	C6H2N6O6	-44.1	1.758	419.1	168	5.81	7.743	262.2	5621	22	19	c1(c(cc(cc1[N+](=O)[O-])[N+](=O)[O-])[N+](=O)[O-])N=[N+]=[N-]
5-Nitro-2-nitratomethyl-1,2,3,4-tetrazole		Unst. (tetrazole)	C2H2N6O5	0	1.844	296.8	122	6.33	9.021	366.2	7923	9	17	c1(nnn(n1)CO[N+](=O)[O-])[N+](=O)[O-]
Azidopentanitrobenzene	CL-16	Unst. (azide)	C6N8O10	-9.3	1.921	545.2	225	6.65	8.889	364.1	7798	8	17	c1(c(c(c(c(c1[N+](=O)[O-])[N+](=O)[O-])[N+](=O)[O-])[N+](=O)[O-])[N+](=O)[O-])N=[N+]=[N-]
1-Picrylbenzotriazole		Unst. (N2 loss)	C12H6N6O6	-101.8	1.643	480.4	183	4.88	6.372	170.3	3425	178	11	c1cccc2c1nnn2c1c(cc(cc1[N+](=O)[O-])[N+](=O)[O-])[N+](=O)[O-]
1-Picryl-1,2,3-triazole		Unst. (N2 loss)	C8H4N6O6	-68.5	1.701	422.3	162	5.46	7.196	221.9	4796	52	10	n1ccn(n1)c1c(cc(cc1[N+](=O)[O-])[N+](=O)[O-])[N+](=O)[O-]
2-Diazo-4,6-dinitrophenol	DDNP	Unst.	C6H2N4O5	-60.9	1.721	191.5	141	5.13	7.123	219	4349	33	9	c1(c(cc(cc1[N+]#N)[N+](=O)[O-])[N+](=O)[O-])[O-]
HNFX	HNFX	Unst. (NF2)	C6H8N8O4F8	-31.4	1.869	84	137	7.15	9.291	391.5	9579	10	8	C1(CN(CC(CN(C1)[N+](=O)[O-])(N(F)F)N(F)F)[N+](=O)[O-])(N(F)F)N(F)F
3-Methyl-2-diazo-4,5,6-trinitrophenol	Me-NO2-DDNP	Unst.	C7H3N5O7	-50.5	1.747	221.4	173	5.55	7.527	246.8	5183	30	8	c1(c(c(c(c(c1[N+]#N)C)[N+](=O)[O-])[N+](=O)[O-])[N+](=O)[O-])[O-]
5-Chloro-2-diazo-4,6-dinitrophenol	5-Cl-DDNP	Unst.	C6HN4O5Cl	-45.8	1.819	206.4	148	4.64	7.244	234.2	4145	31	8	c1(c(c(c(cc1[N+]#N)[N+](=O)[O-])Cl)[N+](=O)[O-])[O-]
4,4,8,8-Tetranitro-1,11-dinitrato-6-nitrazaundecane		ONO2	C10H16N8O16	-38.1	1.624	-308.3	293	5.77	7.775	251.5	5836	34	87	N(N(=O)=O)(CCC(CCON(=O)=O)(N(=O)=O)N(=O)=O)CCC(CCON(=O)=O)(N(=O)=O)N(=O)=O
Compound (21) in PEP 19,249 (1994)		ONO2	C16H9N9O17	-52.1	1.727	277.2	346	5.8	7.567	247.7	5379	41	61	C(=C\c1c(cc(c(c1[N+](=O)[O-])N(CCO[N+](=O)[O-])[N+](=O)[O-])[N+](=O)[O-])[N+](=O)[O-])/c1c(cc(cc1[N+](=O)[O-])[N+](=O)[O-])[N+](=O)[O-]
Compound (5) in PEP 19,249 (1994)		ONO2	C8H9N7O9	-53	1.731	-39.4	231	4.91	7.534	245.9	5259	140	50	c1(c(c(c(c(c1[N+](=O)[O-])N)[N+](=O)[O-])N)[N+](=O)[O-])NCCO[N+](=O)[O-]
Compound (2) in PEP 19,249 (1994)		ONO2	C12H15N9O15	-50.3	1.664	-138	328	5.37	7.554	241.2	5429	87	43	c1(c(c(c(c(c1[N+](=O)[O-])NCCO[N+](=O)[O-])[N+](=O)[O-])NCCO[N+](=O)[O-])[N+](=O)[O-])NCCO[N+](=O)[O-]
Nitrocellulose	NC	ONO2	C12H14N6O22	-24.2	1.852	-976.1	333	5.61	8.425	320.2	6756	41	39	O1C(C2C(C(C1OC1C(OC(C(C1O[N+](=O)[O-])O[N+](=O)[O-])O2)CO[N+](=O)[O-])O[N+](=O)[O-])O[N+](=O)[O-])CO[N+](=O)[O-]
3,5,5-trinitro-3-azahexyl nitrate		ONO2	C5H9N5O9	-31.1	1.617	-143.4	168	5.87	7.904	259.2	6031	28	21	N(N(=O)=O)(CCON(=O)=O)CC(N(=O)=O)(C)N(=O)=O
1,2,3-propanetriol trinitrate		ONO2	C3H5N3O9	3.5	1.73	-295.4	146	5.92	8.507	313.4	6714	12	20	O(CC(ON(=O)=O)CON(=O)=O)N(=O)=O
Compound (1) in PEP 19,249 (1994)		ONO2	C10H10N8O14	-37.7	1.719	8.8	283	5.8	7.916	270.3	6045	36	20	c1(c(cc(c(c1[N+](=O)[O-])N(CCO[N+](=O)[O-])[N+](=O)[O-])[N+](=O)[O-])[N+](=O)[O-])NCCO[N+](=O)[O-]
2,2-bis(nitroxymethyl)-1,3-propanediol dinitrate	PETN	ONO2	C5H8N4O12	-10.1	1.697	-380.3	192	6.23	8.401	302	6794	17	13	C(C(CON(=O)=O)(CON(=O)=O)CON(=O)=O)ON(=O)=O
3-[N-(2,2,2-trintro-ethyl)nitramino]propyl nitrate		ONO2	C5H8N6O11	-14.6	1.705	-77.6	200	6.3	8.438	305.6	6981	16	12	N(CCCON(=O)=O)(CC(N(=O)=O)(N(=O)=O)N(=O)=O)N(=O)=O
1,9-dinitrato-2,4,6,8-tetranitrazanonane		ONO2	C5H10N10O14	-3.7	1.742	-1.6	260	6.26	8.736	331.9	7395	11	10	O(CN(CN(CN(CN(CON(=O)=O)N(=O)=O)N(=O)=O)N(=O)=O)N(=O)=O)N(=O)=O
N-(2,2,2-trinitroethyl)-nitraminoethyl nitrate		ONO2	C4H6N6O11	0	1.767	-44.5	193	6.56	8.852	343.7	7698	10	7	N(N(=O)=O)(CC(N(=O)=O)(N(=O)=O)N(=O)=O)CCON(=O)=O
Erythritol tetranitrate	ETN	ONO2	C4H6N4O12	5.3	1.751	-369.1	189	5.76	8.49	314.4	6605	11	6	O(CC(C(CO[N+](=O)[O-])O[N+](=O)[O-])O[N+](=O)[O-])[N+](=O)[O-]
N-Nitro-N-methylformamide		NNO2	C2H4N2O3	-46.1	1.484	-141.3	71	4.5	6.919	187.7	4056	118	320	CN(C=O)[N+](=O)[O-]
1,7-dimethoxy-2,4,6-trinitrazaheptane		NNO2	C6H14N6O8	-59	1.487	-197.2	170	5.11	7.124	199.2	4790	122	166	N(N(=O)=O)(CN(COC)N(=O)=O)CN(N(=O)=O)COC
2,2-dinitropropanediol-bis-(5,5-dinitro-2-nitraza-hexanoate)		NNO2	C13H18N10O20	-37.8	1.636	-793.9	356	5.03	7.494	234.8	5029	57	138	O(CC(N(=O)=O)(COC(=O)N(CCC(C)(N(=O)=O)N(=O)=O)N(=O)=O)N(=O)=O)C(=O)N(CCC(N(=O)=O)(C)N(=O)=O)N(=O)=O
N-methyl-N,N'-dinitro-1,2-ethanediamine		NNO2	C3H8N4O4	-58.5	1.483	16.5	110	5.32	7.258	206.4	5108	69	114	N(N(=O)=O)CCN(N(=O)=O)C
1,4-dinitroglycoluril		NNO2	C4H4N6O6	-27.6	1.883	-60.6	142	4.6	8.131	301.2	5785	79	100	N1C(=O)N(C2C1N(C(=O)N2)[N+](=O)[O-])[N+](=O)[O-]
N,N'-dinitro-N,N'-bis-(3-nitrazabutyl)-oxamide		NNO2	C8H14N8O10	-54.4	1.556	-133.5	221	5.05	7.226	211.3	4845	79	90	N(CCN(C(=O)C(=O)N(N(=O)=O)CCN(C)N(=O)=O)N(=O)=O)(N(=O)=O)C
2-Nitroimino-5-nitrohexahydro-1,3,5-triazine		NNO2	C3H6N6O4	-42.1	1.722	187.5	127	5.17	7.987	275.5	6078	73	80	C1(=N[N+](=O)[O-])NCN(CN1)[N+](=O)[O-]
N-(2,2-dinitrobutyl)-N-2,2-trinitro-1-butanamine		NNO2	C8H14N6O10	-58.7	1.531	-112.6	199	5.56	7.275	211.9	5155	64	80	N(N(=O)=O)(CC(N(=O)=O)(N(=O)=O)CC)CC(N(=O)=O)(CC)N(=O)=O
N,N'-dimethyl-N,N'-dinitrooxamide		NNO2	C4H6N4O6	-38.8	1.595	-199.8	126	4.8	7.32	220.4	4681	77	79	N(N(=O)=O)(C)C(=O)C(=O)N(N(=O)=O)C
2,2,4,7,9,9-hexanitro-4,7-diazadecane		NNO2	C8H14N8O12	-42.5	1.592	-82	233	5.7	7.663	241.2	5686	37	72	N(CCN(CC(N(=O)=O)(N(=O)=O)C)N(=O)=O)(CC(C)(N(=O)=O)N(=O)=O)N(=O)=O
Compound (16) in PEP 39,90 (2014)		NNO2	C10H10N8O14	-37.7	1.726	-625.2	244	4.53	7.461	240.7	4751	88	63	N1(C(=O)N(C2(C1(N(C(=O)N2[N+](=O)[O-])[N+](=O)[O-])C(=O)OCC)C(=O)OCC)[N+](=O)[O-])[N+](=O)[O-]
,4,6,8-tetraazabicyclo[3.3.0]octane-3-one	HK-55	NNO2	C4H5N7O7	-21.3	1.847	76.3	151	5.38	8.477	323.6	6717	24	61	N1(CN(C2C1N(C(=O)N2)[N+](=O)[O-])[N+](=O)[O-])[N+](=O)[O-]
N,N'-dinitro-N,N'-bis-[2-(nitroamino)ethyl]-1,2-ethanediamine		NNO2	C6H14N8O8	-54	1.552	74.7	210	5.38	7.473	225.6	5438	54	53	C(CN(N(=O)=O)CCNN(=O)=O)N(N(=O)=O)CCNN(=O)=O
2,2,6,9,9-pentanitro-4-oxa-5-oxo-6-azadecane		NNO2	C8H12N6O12	-41.6	1.601	-482.3	218	5.03	7.382	224.7	4895	61	47	N(N(=O)=O)(CCC(C)(N(=O)=O)N(=O)=O)C(=O)OCC(N(=O)=O)(C)N(=O)=O
2,2,4,7,7,10,12,12-octanitro-4,10-diazatridecane		NNO2	C11H18N10O16	-43.9	1.6	-144.4	304	5.68	7.638	240.5	5645	38	44	N(CCC(N(=O)=O)(N(=O)=O)CCN(N(=O)=O)CC(N(=O)=O)(C)N(=O)=O)(CC(C)(N(=O)=O)N(=O)=O)N(=O)=O
trinitroethyl-2-methoxy-ethylnitramine		NNO2	C5H9N5O9	-31.1	1.617	-140.5	168	5.88	7.907	259.5	6042	36	42	N(CCOC)(CC(N(=O)=O)(N(=O)=O)N(=O)=O)N(=O)=O
N,N'-dinitro-N-[2-(nitroamino)ethyl]-1,2-ethanediamine		NNO2	C4H10N6O6	-47	1.567	49.9	162	5.43	7.624	236.3	5630	46	39	N(N(=O)=O)CCN(N(=O)=O)CCNN(=O)=O
2,2,5,7,7,9,12,12-octanitro-5,9-diazatridecane		NNO2	C11H18N10O16	-43.9	1.6	-102.3	304	5.76	7.664	242.1	5721	38	37	N(CC(N(=O)=O)(CN(N(=O)=O)CCC(N(=O)=O)(N(=O)=O)C)N(=O)=O)(CCC(N(=O)=O)(C)N(=O)=O)N(=O)=O
N,N'-dinitro-N,N'-bis-(3,3-dintrobutyl)-oxamide-triazatetradecane		NNO2	C10H14N8O14	-44.2	1.613	-366.2	267	5.18	7.431	228.8	5061	55	37	O=C(N(N(=O)=O)CCC(N(=O)=O)(N(=O)=O)C)C(=O)N(N(=O)=O)CCC(N(=O)=O)(N(=O)=O)C
1,4,5,8-tetranitro-hexahydropyrazino[2,3:b]piperazine		NNO2	C6H10N8O8	-44.7	1.716	273.2	172	5.9	8.114	283.7	6693	30	35	N1(CCN(C2C1N(CCN2[N+](=O)[O-])[N+](=O)[O-])[N+](=O)[O-])[N+](=O)[O-]
N,N'-3,3-tetranitro-1,5-pentanediamine		NNO2	C5H10N6O8	-39.7	1.613	-52.1	186	5.53	7.761	249.5	5784	37	35	N(CCC(N(=O)=O)(N(=O)=O)CCNN(=O)=O)N(=O)=O
2,2,2-trinitroethyl-4-nitrazavalerate		NNO2	C6H9N5O10	-33.4	1.631	-311.3	186	5.38	7.678	246	5431	47	35	N(CC(=O)OCC([N+](=O)[O-])([N+](=O)[O-])[N+](=O)[O-])(CC)[N+](=O)[O-]
N,N'-dinitro-1,2-ethanediamine		NNO2	C2H6N4O4	-32	1.605	35.7	115	5.62	7.997	264.1	6156	33	34	N(N(=O)=O)CCNN(=O)=O
2,4,6-Trinitrophenylmethylnitramine	Tetryl	NNO2	C7H5N5O8	-47.4	1.707	142.9	171	5.78	7.649	251.3	5563	38	32	c1(c(cc(cc1[N+](=O)[O-])[N+](=O)[O-])[N+](=O)[O-])N([N+](=O)[O-])C
cyclotetrametylene-tetranitramine		NNO2	C4H8N8O8	-21.6	1.758	251.5	169	6.2	8.641	326.5	7483	16	29	C1N(CN(CN(CN1N(=O)=O)N(=O)=O)N(=O)=O)N(=O)=O
bis-(2,2,2-trinitroethyl)-3,6-dintraza-1,8-octanedioate		NNO2	C10H12N10O20	-16.2	1.735	-637.5	347	5.44	8.115	285.7	5986	25	29	N(N(=O)=O)(CC(=O)OCC(N(=O)=O)(N(=O)=O)N(=O)=O)CCN(N(=O)=O)CC(=O)OCC(N(=O)=O)(N(=O)=O)N(=O)=O
bis-(2,2,2-trinitroethyl)-4-nitraza-1,7-heptanedioate		NNO2	C10H12N8O18	-24	1.703	-724.4	314	5.21	7.842	263.7	5503	36	29	N(N(=O)=O)(CCC(=O)OCC(N(=O)=O)(N(=O)=O)N(=O)=O)CCC(=O)OCC(N(=O)=O)(N(=O)=O)N(=O)=O
N-(2,2-nitropropyl)-N,2,2-trinitro-1-propanamine		NNO2	C6H10N6O10	-34.3	1.615	-106.9	186	5.82	7.825	253.9	5903	30	29	N(N(=O)=O)(CC(N(=O)=O)(N(=O)=O)C)CC(N(=O)=O)(C)N(=O)=O
cyclotrimethylene-trinitramine	RDX	NNO2	C3H6N6O6	-21.6	1.757	186.2	129	6.18	8.63	325.6	7452	16	26	N1(CN(CN(C1)N(=O)=O)N(=O)=O)N(=O)=O
trinitroethyl-5,5-dinitro-3-nitrazahexanoate		NNO2	C7H9N7O14	-17.3	1.712	-371	243	5.64	8.127	284.2	6116	24	25	O(CC(N(=O)=O)(N(=O)=O)N(=O)=O)C(=O)CN(N(=O)=O)CC(C)(N(=O)=O)N(=O)=O
Compound (15) in PEP 39,90 (2014)		NNO2	C8H6N8O14	-18.3	1.82	-465.6	230	5.01	8.073	291	5712	43	25	N1(C(=O)N(C2(C1(N(C(=O)N2[N+](=O)[O-])[N+](=O)[O-])C(=O)OC)C(=O)OC)[N+](=O)[O-])[N+](=O)[O-]
1,1,1,3,6,6,8,10,10,13,15,15,15-tridecanitro-3,8,13-triazapentadecane		NNO2	C12H16N16O26	-12	1.753	108	458	6.4	8.609	323.5	7319	13	23	N(=O)(=O)C(N(=O)=O)(CN(CCC(CN(N(=O)=O)CC(CCN(CC(N(=O)=O)(N(=O)=O)N(=O)=O)N(=O)=O)(N(=O)=O)N(=O)=O)(N(=O)=O)N(=O)=O)N(=O)=O)N(=O)=O
2,2,2-trinitroethyl-2,5,5-trinitro-2-azahexanoate		NNO2	C7H9N7O14	-17.3	1.712	-370.6	243	5.64	8.127	284.2	6116	24	22	O(CC(N(=O)=O)(N(=O)=O)N(=O)=O)C(=O)N(N(=O)=O)CCC(N(=O)=O)(N(=O)=O)C
N-nitro-N,N'-bis-(trinitropropyl)-urea		NNO2	C7H9N9O15	-12.2	1.757	-177.1	280	5.87	8.422	310.1	6707	18	21	N(C(=O)NCCC(N(=O)=O)(N(=O)=O)N(=O)=O)(CCC(N(=O)=O)(N(=O)=O)N(=O)=O)N(=O)=O
N-Methyl-2-amino-N,3,4,5,6-pentanitrotoluene		NNO2	C8H6N6O10	-41.6	1.729	186.1	203	6.03	7.883	269	6048	35	21	c1(c(c(c(c(c1N(C)[N+](=O)[O-])[N+](=O)[O-])[N+](=O)[O-])[N+](=O)[O-])[N+](=O)[O-])C
2,2,2-trinitroethyl-3,3-dinitrobutyl nitramine		NNO2	C6H9N7O12	-19.4	1.692	-51.3	217	6.19	8.294	293.8	6716	17	20	N(CCC(N(=O)=O)(N(=O)=O)C)(CC(N(=O)=O)(N(=O)=O)N(=O)=O)N(=O)=O
Compound (2) in JOC 61,9340 (1996)		NNO2	C6H8N8O8	-40	1.761	490.2	163	6.5	8.419	310.3	7485	22	19	C12C(C3C1N(CN3[N+](=O)[O-])[N+](=O)[O-])N(CN2[N+](=O)[O-])[N+](=O)[O-]
1,1,1,3,6,9,12,14,14,14-decanitro-3,6,9,12-tetraza-tetradecane		NNO2	C10H16N14O20	-19.6	1.709	177.2	377	6.28	8.416	304.4	7017	16	19	N(N(=O)=O)(CCN(N(=O)=O)CC(N(=O)=O)(N(=O)=O)N(=O)=O)CCN(N(=O)=O)CCN(N(=O)=O)CC(N(=O)=O)(N(=O)=O)N(=O)=O
1,1,1,18,18,18-hexanitro-3,16-dioxa-4,15-dioxo-5,8,11-14-tetranitrazaoctadecane		NNO2	C12H16N14O24	-17.3	1.729	-451.1	429	5.68	8.219	292.4	6311	23	19	C(OC(=O)N(CCN(CCN(CCN(C(=O)OCC([N+](=O)[O-])([N+](=O)[O-])[N+](=O)[O-])[N+](=O)[O-])[N+](=O)[O-])[N+](=O)[O-])[N+](=O)[O-])C([N+](=O)[O-])([N+](=O)[O-])[N+](=O)[O-]
trinitroethyl-N-ethyl-N-nitro-carbamate		NNO2	C5H7N5O10	-18.8	1.687	-328.2	179	5.45	7.989	272.1	5810	31	19	O(CC(N(=O)=O)(N(=O)=O)N(=O)=O)C(=O)N(N(=O)=O)CC
2,2,2-Trinitroethyl-2,4,6,6-tetranitro-2,4-diazaheptanoate		NNO2	C7H9N9O16	-8.4	1.751	-282.5	277	5.87	8.434	310.3	6669	17	18	O=C(N(CN(N(=O)=O)CC(C)(N(=O)=O)N(=O)=O)N(=O)=O)OCC(N(=O)=O)(N(=O)=O)N(=O)=O
N-Methyl-3-amino-N,2,4,5,6-pentanitrotoluene		NNO2	C8H6N6O10	-41.6	1.729	177.8	203	6	7.875	268.5	6025	35	18	c1(c(c(c(c(c1[N+](=O)[O-])N(C)[N+](=O)[O-])[N+](=O)[O-])[N+](=O)[O-])[N+](=O)[O-])C
N-nitro-N-(trinitroethyl)-glycinamide		NNO2	C4H6N6O9	-11.3	1.77	-138.9	182	5.62	8.437	312.6	6617	22	17	C(C([N+](=O)[O-])([N+](=O)[O-])[N+](=O)[O-])N(CC(=O)N)[N+](=O)[O-]
N-methyl-N-nitro-(trinitroethyl)-carbamate		NNO2	C4H5N5O10	-2.8	1.754	-286.2	172	5.73	8.428	310.2	6505	18	17	O=C(N(C)N(=O)=O)OCC(N(=O)=O)(N(=O)=O)N(=O)=O
bis-(trinitroethyl)-2,5,8-trinitrazanonanedioate		NNO2	C10H12N12O22	-9.8	1.762	-526.7	381	5.66	8.355	305.7	6438	19	17	O=C(OCC(N(=O)=O)(N(=O)=O)N(=O)=O)N(CCN(N(=O)=O)CCN(C(=O)OCC(N(=O)=O)(N(=O)=O)N(=O)=O)N(=O)=O)N(=O)=O
trinitropropyl-(2,2-dinitropropyl)-nitramine		NNO2	C6H9N7O12	-19.4	1.692	-59.8	217	6.16	8.286	293.2	6690	17	17	N(N(=O)=O)(CC(C)(N(=O)=O)N(=O)=O)CCC(N(=O)=O)(N(=O)=O)N(=O)=O
1,4-bis-(5,5,5-trinitro-2-nitrazapentanoate)-2-butyne		NNO2	C10H8N10O20	-10.9	1.771	-196.5	352	6.06	8.397	309.7	6658	19	16	O(C#COC(=O)N([N+](=O)[O-])CCC([N+](=O)[O-])([N+](=O)[O-])[N+](=O)[O-])C(=O)N([N+](=O)[O-])CCC([N+](=O)[O-])([N+](=O)[O-])[N+](=O)[O-]
2,2-dinitropropyl-5,5,5-trinitro-2-nitrazapentanoate		NNO2	C7H9N7O14	-17.3	1.712	-380.5	243	5.62	8.119	283.6	6090	24	16	N(N(=O)=O)(C(=O)OCC(N(=O)=O)(C)N(=O)=O)CCC(N(=O)=O)(N(=O)=O)N(=O)=O
trinitroethyl-nitroguanidine		NNO2	C3H5N7O8	-3	1.82	104.4	183	6.02	8.882	352.3	7540	17	15	N(=C(\N)/NCC([N+](=O)[O-])([N+](=O)[O-])[N+](=O)[O-])/[N+](=O)[O-]
Bis-(5,5,5-trinitro-3-nitrazapentanoyl)-methylenedinitramine		NNO2	C9H10N14O22	-2.4	1.805	-13	391	6.23	8.773	342	7400	11	15	C(N(CC(=O)N(CN(C(=O)CN(CC([N+](=O)[O-])([N+](=O)[O-])[N+](=O)[O-])[N+](=O)[O-])[N+](=O)[O-])[N+](=O)[O-])[N+](=O)[O-])C([N+](=O)[O-])([N+](=O)[O-])[N+](=O)[O-]
bis-(5,5,5-trinitro-3-nitrazapentanoyl)-methylenedinitramine		NNO2	C9H14N14O20	-12.5	1.75	205.6	381	6.39	8.647	326.1	7413	13	15	N(C(NN(=O)=O)(CCN(N(=O)=O)CC(N(=O)=O)(N(=O)=O)N(=O)=O)CCN(CC(N(=O)=O)(N(=O)=O)N(=O)=O)N(=O)=O)N(=O)=O
2',2',2'-trinitroethyl-2,5-dinitrazahexanoate		NNO2	C6H9N7O12	-19.4	1.69	-266.1	219	5.6	8.084	278.9	6069	27	15	N(N(=O)=O)(CCN(C(=O)OCC(N(=O)=O)(N(=O)=O)N(=O)=O)N(=O)=O)C
1,3,3,5,5-pentanitropiperidine		NNO2	C5H6N6O10	-15.5	1.799	-4.3	176	6.2	8.623	329.7	7302	14	14	N(=O)(=O)C1(CN(CC(C1)(N(=O)=O)N(=O)=O)N(=O)=O)N(=O)=O
bis-(2,2,2-trinitroethyl)-3-nitrazaglutarate		NNO2	C8H8N8O18	-6.3	1.781	-640.8	300	5.52	8.329	305.8	6254	20	14	C(N(CC(=O)OCC([N+](=O)[O-])([N+](=O)[O-])[N+](=O)[O-])[N+](=O)[O-])C(=O)OCC([N+](=O)[O-])([N+](=O)[O-])[N+](=O)[O-]
Hexanitrohexaazaisowurtzitane	HNIW or CL-20	NNO2	C6H6N12O12	-11	1.994	564.8	224	6.48	9.434	418.9	9040	8	13	C12N(C3C(N1[N+](=O)[O-])N(C1C(N3[N+](=O)[O-])N(C2N1[N+](=O)[O-])[N+](=O)[O-])[N+](=O)[O-])[N+](=O)[O-]
N,N'-dinitromethanediamine		NNO2	CH4N4O4	0	1.743	61.2	108	6.1	8.925	346.5	7614	13	13	C(NN(=O)=O)NN(=O)=O
bis-(trinitroethyl)-2,4,6-trinitrazaheptanedioate		NNO2	C8H8N12O22	5.1	1.832	-435.3	368	5.31	8.513	324.9	6416	12	13	O=C(OCC(N(=O)=O)(N(=O)=O)N(=O)=O)N(CN(CN(C(=O)OCC(N(=O)=O)(N(=O)=O)N(=O)=O)N(=O)=O)N(=O)=O)N(=O)=O
N,N'-dinitromethylene-bis-(4,4,4-trinitro)-butyramide		NNO2	C9H10N10O18	-14.6	1.753	-224.4	323	5.89	8.34	303.6	6576	18	13	O=C(CCC(N(=O)=O)(N(=O)=O)N(=O)=O)N(CN(N(=O)=O)C(=O)CCC(N(=O)=O)(N(=O)=O)N(=O)=O)N(=O)=O
1,3,5-tris(1-oxo-5,5,5-trinitro-3-nitrazapentyl)-s-triazacyclohexane		NNO2	C15H18N18O27	-21.8	1.753	-167.4	494	5.73	8.249	297	6453	26	13	C1N(CN(CN1C(=O)CN(CC([N+](=O)[O-])([N+](=O)[O-])[N+](=O)[O-])[N+](=O)[O-])C(=O)CN(CC([N+](=O)[O-])([N+](=O)[O-])[N+](=O)[O-])[N+](=O)[O-])C(=O)CN(CC([N+](=O)[O-])([N+](=O)[O-])[N+](=O)[O-])[N+](=O)[O-]
1,1,1,3,6,9,11,11,11-nonanitro-3,6,9-triazaundecane		NNO2	C8H12N12O18	-11.3	1.744	146.6	330	6.43	8.638	324.7	7391	12	12	N(N(=O)=O)(CC(N(=O)=O)(N(=O)=O)N(=O)=O)CCN(N(=O)=O)CCN(N(=O)=O)CC(N(=O)=O)(N(=O)=O)N(=O)=O
bis-(trinitroethyl)-5,5-dinitro-2,8-dintraza-nonanedioate		NNO2	C11H12N12O24	-9.2	1.771	-616.9	405	5.7	8.372	307.8	6468	19	12	N(=O)(=O)C(N(=O)=O)(CCN(N(=O)=O)C(=O)OCC(N(=O)=O)(N(=O)=O)N(=O)=O)CCN(C(=O)OCC(N(=O)=O)(N(=O)=O)N(=O)=O)N(=O)=O
Compound (1) in JOC 61,9340 (1996)		NNO2	C6H4N8O10	-18.4	1.894	235.3	183	6.06	8.723	347.8	7447	17	11	C12C(C3C1N(C(=O)N3[N+](=O)[O-])[N+](=O)[O-])N(C(=O)N2[N+](=O)[O-])[N+](=O)[O-]
1,1,1,4,6,6,8,11,11,11-Decanitro-4,8-diazaundecane		NNO2	C9H12N12O20	-10.5	1.755	41.4	353	6.4	8.627	325.1	7328	12	11	N(CC(N(=O)=O)(CN(N(=O)=O)CCC(N(=O)=O)(N(=O)=O)N(=O)=O)N(=O)=O)(CCC(N(=O)=O)(N(=O)=O)N(=O)=O)N(=O)=O
1,1,1,5,7,10,14,14,14-nonanitro-3,12-dioxa-4,11-dioxo-5,7,10-triazatetradecane		NNO2	C9H10N12O22	-2.5	1.796	-479.7	374	5.8	8.571	325.4	6797	15	11	C(COC(=O)N(CN(CCN(C(=O)OCC([N+](=O)[O-])([N+](=O)[O-])[N+](=O)[O-])[N+](=O)[O-])[N+](=O)[O-])[N+](=O)[O-])([N+](=O)[O-])([N+](=O)[O-])[N+](=O)[O-]
trinitroethyl-cyanomethylnitramine		NNO2	C4H4N6O8	-12.1	1.737	216.2	173	6.46	8.507	314.2	7110	13	11	N(CC#N)(CC([N+](=O)[O-])([N+](=O)[O-])[N+](=O)[O-])[N+](=O)[O-]
Compound (14) in PEP 39,90 (2014)		NNO2	C6H6N8O10	-22.8	1.803	35.1	179	5.59	8.31	306.6	6516	23	11	N1(C(=O)N(C2(C1(N(C(=O)N2[N+](=O)[O-])[N+](=O)[O-])C)C)[N+](=O)[O-])[N+](=O)[O-]
N-methyl-N'-trinitroethyl-N,N'-dinitro-1,2-ethanediamine		NNO2	C5H9N7O10	-22	1.666	69.5	194	6.25	8.284	290.3	6791	18	11	N(CCN(N(=O)=O)C)(CC(N(=O)=O)(N(=O)=O)N(=O)=O)N(=O)=O
1,1,1,3,6,6,9,11,11,11-decanitro-3,9-diazaundecane		NNO2	C9H12N12O20	-10.5	1.755	73.7	353	6.46	8.645	326.5	7391	12	10	N(CCC(N(=O)=O)(N(=O)=O)CCN(N(=O)=O)CC(N(=O)=O)(N(=O)=O)N(=O)=O)(CC(N(=O)=O)(N(=O)=O)N(=O)=O)N(=O)=O
bis-(trinitroethyl)-2,4-dinitrazapentanedioate		NNO2	C7H6N10O20	8.7	1.851	-510.1	327	4.8	8.334	313.2	5851	12	10	C(N(N(=O)=O)C(=O)OCC(N(=O)=O)(N(=O)=O)N(=O)=O)N(C(=O)OCC(N(=O)=O)(N(=O)=O)N(=O)=O)N(=O)=O
methyl-2,2,2-trinitroethylnitramine		NNO2	C3H5N5O8	-3.3	1.73	37.9	146	6.6	8.748	331.4	7567	11	9	N(N(=O)=O)(CC(N(=O)=O)(N(=O)=O)N(=O)=O)C
2,2,2-trinitroethyl-N-(2,2,2-trinitroethyl)-nitramino acetate		NNO2	C6H6N8O16	3.6	1.807	-111.5	263	6.08	8.71	337.3	7154	11	9	C([C@H](CC(N(=O)=O)(N(=O)=O)N(=O)=O)N(N(=O)=O)OC(=O)C)(N(=O)=O)(N(=O)=O)N(=O)=O
N-nitro-N-(3,3,3-trinitropropyl)-2,2,2-trintroethyl carbamate		NNO2	C6H6N8O16	3.6	1.82	-288.9	267	5.67	8.604	330.5	6755	11	9	O=C(N(N(=O)=O)CCC(N(=O)=O)(N(=O)=O)N(=O)=O)OCC(N(=O)=O)(N(=O)=O)N(=O)=O
N,N'-dinitro-N,N'-bis-(3,3,3-trinitropropyl)-oxamide		NNO2	C8H8N10O18	-6	1.793	-184.9	316	6.05	8.59	326.5	6995	13	9	N(CCC(N(=O)=O)(N(=O)=O)N(=O)=O)(N(=O)=O)C(=O)C(=O)N(CCC(N(=O)=O)(N(=O)=O)N(=O)=O)N(=O)=O
1-nitro-2,5-bis-(trinitromethyl)-pyrrolidine		NNO2	C6H6N8O14	-3.9	1.827	124.4	238	6.7	8.956	359	8020	9	6	N1(C(CCC1C([N+](=O)[O-])([N+](=O)[O-])[N+](=O)[O-])C([N+](=O)[O-])([N+](=O)[O-])[N+](=O)[O-])[N+](=O)[O-]
2,2,2-trinitroethyl-3',3',3'-trinitropropylnitramine		NNO2	C5H6N8O14	4	1.812	41.2	241	6.2	8.829	347.2	7463	8	6	N(CCC(N(=O)=O)(N(=O)=O)N(=O)=O)(CC(N(=O)=O)(N(=O)=O)N(=O)=O)N(=O)=O
N,N'-bis-(2,2,2-trinitroethyl)-N,N'-dinitromethanediamine		NNO2	C5H6N10O16	10.4	1.843	136.1	275	5.53	8.702	340.7	6881	7	5	N(N(=O)=O)(CC(N(=O)=O)(N(=O)=O)N(=O)=O)CN(N(=O)=O)CC(N(=O)=O)(N(=O)=O)N(=O)=O
bis-(2,2,2-trinitroethyl)-nitramine	BTNNA	NNO2	C4H4N8O14	16.5	1.873	92	235	4.93	8.525	330	6249	6	5	N(CC(N(=O)=O)(N(=O)=O)N(=O)=O)(N(=O)=O)CC(N(=O)=O)(N(=O)=O)N(=O)=O
Nitromethane	NM	CNO2	CH3NO2	-39.3	1.421	-81.2	48	5.44	7.271	201.1	4880	86	320	C[N+](=O)[O-]
bis-(2,2-dinitropropyl)-carbonate		CNO2	C7H10N4O11	-39.2	1.599	-702.2	186	4.6	7.201	213.7	4402	94	300	O=C(OCC(N(=O)=O)(C)N(=O)=O)OCC(N(=O)=O)(N(=O)=O)C
nitroisobutyl-4,4,4-trinitrobutyrate		CNO2	C8H12N4O10	-59.2	1.535	-505.5	185	4.77	6.92	192.1	4246	128	279	O=C(CCC(N(=O)=O)(N(=O)=O)N(=O)=O)OCC(C)(C)N(=O)=O
1,3,5,7-Tetranitroadamantane		CNO2	C10H12N4O8	-91.1	1.681	-245	152	4.58	6.845	199.3	4502	230	240	C12(CC3(CC(C1)(CC(C2)(C3)[N+](=O)[O-])[N+](=O)[O-])[N+](=O)[O-])[N+](=O)[O-]
bis-(2,2-dinitropropyl)-oxalate		CNO2	C8H10N4O12	-40.7	1.612	-807.2	203	4.45	7.109	209.3	4193	119	227	O=C(OCC(N(=O)=O)(C)N(=O)=O)C(=O)OCC(N(=O)=O)(C)N(=O)=O
2',2'-dinitropropyl-2,4,6-trinitrobenzoate		CNO2	C10H7N5O12	-47.3	1.699	-340.7	227	5.01	7.315	229.1	4661	68	214	c1c(c(c(cc1N(=O)=O)N(=O)=O)C(=O)OCC(N(=O)=O)(N(=O)=O)C)N(=O)=O
2,2-dinitropropyl-trinitrobutyrate		CNO2	C7H9N5O12	-29.3	1.661	-489.2	209	5.25	7.695	250	5331	40	151	O=C(CCC(N(=O)=O)(N(=O)=O)N(=O)=O)OCC(N(=O)=O)(N(=O)=O)C
2,2,2-trinitroethyl-4,4-dinitrohexanoate		CNO2	C8H11N5O12	-41.2	1.616	-500.3	216	5.13	7.424	228.6	4974	59	138	N(=O)(=O)C(N(=O)=O)(N(=O)=O)COC(=O)CCC(N(=O)=O)(N(=O)=O)CC
5,5,5-trinitropentan-2-one		CNO2	C5H7N3O7	-47	1.582	-229	136	5.29	7.33	219.8	4939	61	125	N(=O)(=O)C(N(=O)=O)(CCC(=O)C)N(=O)=O
ethylene-bis-(4,4,4-trinitrobutyrate)		CNO2	C10H12N6O16	-33.9	1.664	-795.8	280	4.96	7.519	238.9	4963	59	120	O(CCOC(=O)CCC(N(=O)=O)(N(=O)=O)N(=O)=O)C(=O)CCC(N(=O)=O)(N(=O)=O)N(=O)=O
methylene-bis-(4,4,4-trinitrobutyramide)		CNO2	C9H12N8O14	-35.1	1.674	-443.4	284	5.04	7.635	247.3	5242	56	113	O=C(CCC(N(=O)=O)(N(=O)=O)N(=O)=O)NCNC(=O)CCC(N(=O)=O)(N(=O)=O)N(=O)=O
N-(2-propyl)-trinitroacetamide		CNO2	C5H8N4O7	-47.4	1.564	-210.5	146	5.09	7.272	214.7	4813	90	112	O=C(C(N(=O)=O)(N(=O)=O)N(=O)=O)NC(C)C
2,2-dinitro-1,3-propane-diol		CNO2	C3H6N2O6	-28.9	1.712	-431.8	134	4.51	7.74	257.7	5156	118	110	C(C(N(=O)=O)(N(=O)=O)CO)O
N-(t-butyl)-trinitroacetamide		CNO2	C6H10N4O7	-64	1.502	-228.9	145	4.91	6.892	187.7	4331	151	110	O=C(C(N(=O)=O)(N(=O)=O)N(=O)=O)NC(C)(C)C
1-dinitromethyl-3-nitrobenzene		CNO2	C7H5N3O6	-74	1.61	32.6	138	5.23	6.831	193.1	4118	76	105	c1cc(cc(c1)N(=O)=O)C(N(=O)=O)N(=O)=O
2,2-dinitrobutyl-4,4,4-trinitrobutyramide		CNO2	C8H12N6O11	-47.8	1.598	-324.2	221	5.13	7.36	223.1	4980	69	101	O=C(NCC(CC)([N+](=O)[O-])[N+](=O)[O-])CCC([N+](=O)[O-])([N+](=O)[O-])[N+](=O)[O-]
ethyl-2,2,2-trinitroethylcarbonate		CNO2	C5H7N3O9	-28.4	1.634	-585.1	154	4.7	7.429	230.6	4672	82	81	O=C(OCC(N(=O)=O)(N(=O)=O)N(=O)=O)OCC
3,3,4,4-tetranitrohexane		CNO2	C6H10N4O8	-54.1	1.536	-103.8	152	5.8	7.376	218.3	5329	60	80	CCC(N(=O)=O)(N(=O)=O)C(N(=O)=O)(CC)N(=O)=O
2',2',2'-trinitroethyl-3,5-dinitrobenzoate		CNO2	C9H5N5O12	-36.3	1.75	-290.4	223	5.23	7.612	252.7	5093	38	73	N(=O)(=O)c1cc(cc(c1)N(=O)=O)C(=O)OCC(N(=O)=O)(N(=O)=O)N(=O)=O
2,2-dinitropropyl-4,4,4-trinitrobutyramide		CNO2	C7H10N6O11	-36.1	1.642	-291.2	214	5.32	7.653	245.4	5400	47	72	O=C(CCC(N(=O)=O)(N(=O)=O)N(=O)=O)NCC(N(=O)=O)(N(=O)=O)C
N,N-bis-(2,2-dinitropropyl)-4,4,4-trinitrobutyramide		CNO2	C10H14N8O15	-39.5	1.627	-311.5	274	5.51	7.632	242.7	5472	46	72	O=C(CCC(N(=O)=O)(N(=O)=O)N(=O)=O)N(CC(N(=O)=O)(C)N(=O)=O)CC(N(=O)=O)(C)N(=O)=O
2,2,2-trinitroethyl-4,4-dinitrovalerate		CNO2	C7H9N5O12	-29.3	1.661	-440.7	209	5.39	7.744	253.2	5468	40	70	O(CC(N(=O)=O)(N(=O)=O)N(=O)=O)C(=O)CCC(N(=O)=O)(C)N(=O)=O
bis-(2,2,2-trinitroethyl)-4,4-dinitroheptanedioate		CNO2	C11H12N8O20	-22.2	1.717	-792.4	337	5.34	7.912	269.8	5635	34	68	C(=O)(CCC(N(=O)=O)(N(=O)=O)CCC(=O)OCC(N(=O)=O)(N(=O)=O)N(=O)=O)OCC(N(=O)=O)(N(=O)=O)N(=O)=O
3,3,9,9-tetranitro-1,5,7,11-tetraoxaspiro-(5.5)-undecane		CNO2	C7H8N4O12	-28.2	1.784	-721.4	175	4.84	7.871	273.3	5452	79	66	O1CC(COC21OCC(CO2)([N+](=O)[O-])[N+](=O)[O-])([N+](=O)[O-])[N+](=O)[O-]
bis(2-fluoro-2,2-dinitroethyl)formal	FEFO	CNO2	C5H6N4O10F2	-10	1.774	-775.6	171	5.18	8.247	299.1	6036	42	60	C(OCC([N+](=O)[O-])([N+](=O)[O-])F)OCC([N+](=O)[O-])([N+](=O)[O-])F
2,2,4,6,6-pentanitroheptane		CNO2	C7H11N5O10	-46.7	1.571	-226.8	186	5.54	7.443	225.6	5252	50	56	CC(N(=O)=O)(CC(CC(N(=O)=O)(C)N(=O)=O)N(=O)=O)N(=O)=O
2,2-Dinitropropane-1,3-diol-bis-(4,4,4-trinitrobutyrate)		CNO2	C11H12N8O20	-22.2	1.717	-817.8	337	5.29	7.895	268.7	5587	34	50	O=C(CCC(N(=O)=O)(N(=O)=O)N(=O)=O)OCC(COC(=O)CCC(N(=O)=O)(N(=O)=O)N(=O)=O)(N(=O)=O)N(=O)=O
N,N'-bis-(3,3,3-trinitropropyl)-oxamide		CNO2	C8H10N8O14	-25.3	1.717	-394	277	5.22	7.91	269.7	5661	41	45	O=C(NCCC(N(=O)=O)(N(=O)=O)N(=O)=O)C(=O)NCCC(N(=O)=O)(N(=O)=O)N(=O)=O
2',2',2'-trinitroethyl-3,5-dinitrosalicylate		CNO2	C9H5N5O13	-30.7	1.806	-474.9	247	4.98	7.75	267	5210	42	45	c1c(cc(c(c1C(=O)OCC([N+](=O)[O-])([N+](=O)[O-])[N+](=O)[O-])O)[N+](=O)[O-])[N+](=O)[O-]
4,4,4-trinitrobutyramide		CNO2	C4H6N4O7	-28.8	1.694	-236.8	149	5.07	7.814	261	5500	50	40	O=C(N)CCC(N(=O)=O)(N(=O)=O)N(=O)=O
1,1,1,7,7,7-hexanitroheptan-4-one		CNO2	C7H8N6O13	-20.8	1.718	-228.5	232	5.93	8.167	287.6	6339	21	34	O=C(CCC(N(=O)=O)(N(=O)=O)N(=O)=O)CCC(N(=O)=O)(N(=O)=O)N(=O)=O
1,1,1,3-tetranitrobutane		CNO2	C4H6N4O8	-20.2	1.664	-100.8	146	6.14	8.168	282	6453	21	33	N(=O)(=O)C(N(=O)=O)(N(=O)=O)C[C@@H](N(=O)=O)C
bis-(2,2,2-trinitroethyl)-4,4,6,6,8,8-hexanitro-undecanedioate		CNO2	C15H16N12O28	-19.7	1.734	-766.9	465	5.71	8.124	286.2	6141	25	32	C(C(N(=O)=O)(N(=O)=O)N(=O)=O)OC(=O)CCC(CC(CC(CCC(=O)OCC(N(=O)=O)(N(=O)=O)N(=O)=O)(N(=O)=O)N(=O)=O)(N(=O)=O)N(=O)=O)(N(=O)=O)N(=O)=O
1-(2,2,2-Trinitroethyl)-2,4,6-trinitrobenzene		CNO2	C8H5N5O10	-41.1	1.732	66.2	197	5.89	7.777	262.1	5713	26	31	c1cc(c(cc1N(=O)=O)N(=O)=O)CC(N(=O)=O)(N(=O)=O)N(=O)=O
1-(3,3,3-trinitropropyl)-2,4-dinitrobenzene		CNO2	C9H7N5O10	-53.3	1.677	17.5	204	5.62	7.44	235.1	5181	42	31	c1cc(c(cc1N(=O)=O)N(=O)=O)CCC(N(=O)=O)(N(=O)=O)N(=O)=O
bis-(2,2,2-trinitroethyl)-succinate		CNO2	C8H8N6O16	-14.4	1.746	-675.6	266	5.37	8.064	283.2	5807	31	30	C(CC(=O)OCC(N(=O)=O)(N(=O)=O)N(=O)=O)C(=O)OCC(N(=O)=O)(N(=O)=O)N(=O)=O
4,4,4-trinitrobutyric anhydride		CNO2	C8H8N6O15	-18.7	1.735	-575.2	257	5.37	7.989	276.8	5728	28	30	O(C(=O)CCC(N(=O)=O)(N(=O)=O)N(=O)=O)C(=O)CCC(N(=O)=O)(N(=O)=O)N(=O)=O
N-(trinitropropyl)-3,3,5,5-tetranitro-piperdine		CNO2	C8H10N8O14	-25.3	1.744	-31	246	6.11	8.317	301	6811	23	29	N1(CC(CC(C1)([N+](=O)[O-])[N+](=O)[O-])([N+](=O)[O-])[N+](=O)[O-])CCC([N+](=O)[O-])([N+](=O)[O-])[N+](=O)[O-]
2,2,4,4,6,6-hexanitroheptane		CNO2	C7H10N6O12	-30.3	1.645	-152.4	209	6.01	7.95	265.2	6123	27	29	CC(N(=O)=O)(CC(N(=O)=O)(CC(N(=O)=O)(C)N(=O)=O)N(=O)=O)N(=O)=O
methyl-2,2,2-trinitro-ethyl carbonate		CNO2	C4H5N3O9	-10	1.706	-550.8	147	4.96	7.881	266.6	5288	46	28	O=C(OC)OCC(N(=O)=O)(N(=O)=O)N(=O)=O
methylene-bis-(trinitroethyl)-carbamate		CNO2	C7H8N8O16	-7	1.788	-695.7	288	5.09	8.229	299.2	5910	35	27	C(NC(=O)OCC(N(=O)=O)(N(=O)=O)N(=O)=O)NC(=O)OCC(N(=O)=O)(N(=O)=O)N(=O)=O
1,5-bis-(trinitroethyl)-biuret		CNO2	C6H7N9O14	-5.6	1.815	-311.7	278	5.41	8.484	320.9	6503	26	24	N(C(=O)NCC(N(=O)=O)(N(=O)=O)N(=O)=O)C(=O)NCC(N(=O)=O)(N(=O)=O)N(=O)=O
2',2',2'-trinitroethyl-2,4,6-trinitrobenzoate		CNO2	C8H2N6O14	-11.8	1.872	-175.1	244	5.86	8.412	321.2	6488	15	24	c1c(c(c(cc1N(=O)=O)N(=O)=O)C(=O)OC(N(=O)=O)(N(=O)=O)N(=O)=O)N(=O)=O
2',2',2'-Trinitroethyl-2,4,6-trinitrobenzoate		CNO2	C9H4N6O14	-22.8	1.813	-245.7	251	5.59	8.062	289.5	5883	24	24	c1(cc(cc(c1C(=O)OCC([N+](=O)[O-])([N+](=O)[O-])[N+](=O)[O-])[N+](=O)[O-])[N+](=O)[O-])[N+](=O)[O-]
bis-(trinitropropyl)-urea		CNO2	C7H10N8O13	-23.2	1.712	-224.3	260	5.55	8.09	281.6	6112	33	23	O=C(NCCC(N(=O)=O)(N(=O)=O)N(=O)=O)NCCC(N(=O)=O)(N(=O)=O)N(=O)=O
1-(3,3,3-trinitropropyl)-2,4,6-trinitrobenzene		CNO2	C9H6N6O12	-36.9	1.748	39.4	232	5.9	7.904	272.3	5942	26	21	c1c(cc(c(c1N(=O)=O)CCC(N(=O)=O)(N(=O)=O)N(=O)=O)N(=O)=O)N(=O)=O
bis-(1,1,1-trinitro-2-propyl)-urea		CNO2	C7H10N8O13	-23.2	1.688	-192.6	251	5.65	8.046	276.1	6068	33	19	C(=O)(NC(C([N+](=O)[O-])([N+](=O)[O-])[N+](=O)[O-])C)NC(C([N+](=O)[O-])([N+](=O)[O-])[N+](=O)[O-])C
N-(2,2,2-trinitroethyl)-3,3,5,5-tetranitro-piperidine		CNO2	C7H8N8O14	-14.9	1.793	-8.3	240	6.27	8.614	328.4	7304	17	18	N1(CC(CC(C1)([N+](=O)[O-])[N+](=O)[O-])([N+](=O)[O-])[N+](=O)[O-])CC([N+](=O)[O-])([N+](=O)[O-])[N+](=O)[O-]
2,2,2-trinitroethyl-4,4,4-trinitrobutyrate		CNO2	C6H6N6O14	-4.1	1.784	-395.9	233	5.85	8.484	317.6	6663	16	18	C(=O)(OCC(N(=O)=O)(N(=O)=O)N(=O)=O)CCC(N(=O)=O)(N(=O)=O)N(=O)=O
N-trinitroethyl-4,4,4-trinitrobutyramide		CNO2	C6H7N7O13	-10.4	1.767	-219.2	239	5.86	8.43	311.8	6677	18	18	O=C(CCC(N(=O)=O)(N(=O)=O)N(=O)=O)NCC(N(=O)=O)(N(=O)=O)N(=O)=O
2,2,2-trinitroethyl carbamate		CNO2	C3H4N4O8	0	1.82	-386.3	150	5.03	8.418	316.4	6125	31	18	O(C(=O)N)CC(N(=O)=O)(N(=O)=O)N(=O)=O
N,N'-bis-(2,2,2-trinitroethyl)-urea		CNO2	C5H6N8O13	0	1.822	-187	246	5.85	8.736	341	7109	16	17	O=C(NCC(N(=O)=O)(N(=O)=O)N(=O)=O)NCC(N(=O)=O)(N(=O)=O)N(=O)=O
bis-(trinitroethoxy)-methane		CNO2	C5H6N6O14	4.3	1.796	-327.1	225	5.72	8.576	325.9	6737	14	17	C(OCC(N(=O)=O)(N(=O)=O)N(=O)=O)OCC(N(=O)=O)(N(=O)=O)N(=O)=O
1,1,1,6,6,6-hexanitro-3-hexene		CNO2	C6H6N6O12	-13.6	1.736	34.1	212	6.55	8.473	311.6	7076	12	17	C(C/C=C/CC([N+](=O)[O-])([N+](=O)[O-])[N+](=O)[O-])([N+](=O)[O-])([N+](=O)[O-])[N+](=O)[O-]
bis-(2,2,2-trinitroethyl)-carbonate		CNO2	C5H4N6O15	12.4	1.855	-506.6	235	4.4	8.143	299.4	5339	12	16	O=C(OCC(N(=O)=O)(N(=O)=O)N(=O)=O)OCC(N(=O)=O)(N(=O)=O)N(=O)=O
bis-(trinitroethyl)-oxalate		CNO2	C6H4N6O16	7.7	1.85	-638.5	252	4.7	8.203	303.4	5560	16	15	O=C(OCC(N(=O)=O)(N(=O)=O)N(=O)=O)C(=O)OCC(N(=O)=O)(N(=O)=O)N(=O)=O
trinitroethyl-2,2-dinitropropylcarbonate		CNO2	C6H7N5O13	-11.2	1.728	-608.3	211	5.31	8.065	281.4	5760	30	15	O=C(OCC(N(=O)=O)(N(=O)=O)N(=O)=O)OCC(N(=O)=O)(N(=O)=O)C
bis-(trinitroethyl)-fumarate		CNO2	C8H6N6O16	-10.9	1.765	-585.8	263	5.51	8.133	289.9	5899	25	14	C(=C\C(=O)OCC([N+](=O)[O-])([N+](=O)[O-])[N+](=O)[O-])/C(=O)OCC([N+](=O)[O-])([N+](=O)[O-])[N+](=O)[O-]
bis-(trinitroethyl)-oxamide		CNO2	C6H6N8O14	-3.9	1.82	-321.2	263	5.57	8.527	324.7	6619	20	13	O=C(NCC(N(=O)=O)(N(=O)=O)N(=O)=O)C(=O)NCC(N(=O)=O)(N(=O)=O)N(=O)=O
1-(2,2,2-trinitroethyl)-2,4,6-trinitrobenzene		CNO2	C8H4N6O12	-25.5	1.804	91.7	225	6.16	8.242	301.7	6519	17	13	N(=O)(=O)c1c(c(cc(c1)N(=O)=O)N(=O)=O)CC(N(=O)=O)(N(=O)=O)N(=O)=O
methylene-bis-N'N'-(2,2,2-trinitroacetamide)		CNO2	C5H4N8O14	8	1.883	-210.4	257	4.96	8.503	329.3	6214	14	9	C(NC(=O)C(N(=O)=O)(N(=O)=O)N(=O)=O)NC(=O)C(N(=O)=O)(N(=O)=O)N(=O)=O
1,1,1,3,5,5,5-heptanitropentane		CNO2	C5H5N7O14	6.2	1.825	-42.4	235	5.93	8.723	340.3	7108	8	8	N(=O)(=O)C(N(=O)=O)(N(=O)=O)CC(N(=O)=O)CC(N(=O)=O)(N(=O)=O)N(=O)=O
1,1,1,6,6,6-Hexanitro-3-hexyne		CNO2	C6H4N6O12	-9.1	1.772	205.1	219	6.92	8.66	329.5	7499	9	7	C(CC#CCC([N+](=O)[O-])([N+](=O)[O-])[N+](=O)[O-])([N+](=O)[O-])([N+](=O)[O-])[N+](=O)[O-]
tris-(2,2,2-trinitroethyl)-orthoformate		CNO2	C7H7N9O21	10.1	1.836	-468.1	325	5.08	8.421	318.3	6138	11	7	O(C(OCC(N(=O)=O)(N(=O)=O)N(=O)=O)OCC(N(=O)=O)(N(=O)=O)N(=O)=O)CC(N(=O)=O)(N(=O)=O)N(=O)=O
tetrakis-(2,2,2-trinitroethyl)-orthocarbonate		CNO2	C9H8N12O28	13.1	1.862	-627.4	421	4.73	8.339	314.7	5821	10	7	O(C(OCC(N(=O)=O)(N(=O)=O)N(=O)=O)(OCC(N(=O)=O)(N(=O)=O)N(=O)=O)OCC(N(=O)=O)(N(=O)=O)N(=O)=O)CC(N(=O)=O)(N(=O)=O)N(=O)=O
trinitroethyl-bis-(trinitroethoxy)-acetate		CNO2	C8H7N9O22	6.9	1.834	-625.3	342	5.21	8.427	318.6	6202	13	6	O=C(C(OCC(N(=O)=O)(N(=O)=O)N(=O)=O)OCC(N(=O)=O)(N(=O)=O)N(=O)=O)OCC(N(=O)=O)(N(=O)=O)N(=O)=O
4-picrylamino-1,2,4-triazole		5mArN	C8H5N7O6	-67.8	1.697	474.4	177	5.39	7.256	225.3	4981	281	314	c1n(cnn1)Nc1c(cc(cc1[N+](=O)[O-])[N+](=O)[O-])[N+](=O)[O-]
2-Nitro-1-picryl-imidazole		5mArN	C9H4N6O8	-59.2	1.756	232.2	196	5.24	7.343	235.6	4864	108	312	c1nc([nH]c1c1c(cc(cc1[N+](=O)[O-])[N+](=O)[O-])[N+](=O)[O-])[N+](=O)[O-]
3-nitro-1,2,4-triazol-5-one	NTO	5mArN	C2H2N4O3	-24.6	1.892	-11.2	99	4.04	7.961	289.5	5183	269	291	[nH]1c(=O)[nH]nc1[N+](=O)[O-]
3,5-dinitro-1-methyl-4-picrylaminopyrazole		5mArN	C10H6N8O10	-52.2	1.746	291.6	233	5.43	7.563	249.1	5344	107	274	c1(c(c(n(n1)C)[N+](=O)[O-])Nc1c(cc(cc1[N+](=O)[O-])[N+](=O)[O-])[N+](=O)[O-])[N+](=O)[O-]
3,5-bispicrylamino-1,2,4-triazole		5mArN	C14H7N11O12	-59.9	1.769	417.3	317	5.02	7.351	237.2	4890	132	240	c1(nc([nH]n1)Nc1c(cc(cc1[N+](=O)[O-])[N+](=O)[O-])[N+](=O)[O-])Nc1c(cc(cc1[N+](=O)[O-])[N+](=O)[O-])[N+](=O)[O-]
3-amino-5-picrylamino-1,2,4-triazole		5mArN	C8H6N8O6	-67.1	1.747	320.8	202	4.63	7.209	226.4	4730	425	230	c1(nc([nH]n1)Nc1c(cc(cc1[N+](=O)[O-])[N+](=O)[O-])[N+](=O)[O-])N
2-picryl-1,2,3-triazole		5mArN	C8H4N6O6	-68.5	1.701	396.4	162	5.37	7.166	220	4714	180	200	c1(cc(c(c(c1)[N+](=O)[O-])n1nccn1)[N+](=O)[O-])[N+](=O)[O-]
ANTA-NQ	ANTA-NQ	5mArN	C3H4N8O4	-29.6	1.866	290.9	150	4.71	8.256	308.9	6099	145	188	n1c(nn(c1N)/C(=N/[N+](=O)[O-])/N)[N+](=O)[O-]
4-nitro-1-picrylimidazole		5mArN	C9H4N6O8	-59.2	1.756	224.9	196	5.22	7.336	235.2	4844	105	161	c1(nc[nH]c1c1c(cc(cc1[N+](=O)[O-])[N+](=O)[O-])[N+](=O)[O-])[N+](=O)[O-]
1-Amino-3,5-dinitropyrazole	DNPA	5mArN	C3H3N5O4	-32.4	1.811	297.7	114	6	8.423	315.9	7099	186	158	c1c(nn(c1[N+](=O)[O-])N)[N+](=O)[O-]
4-methyl-3,5-dinitro-1,2,4-triazole		5mArN	C3H3N5O4	-32.4	1.726	258.2	106	5.82	8.082	282.5	6333	101	155	c1(n(c(nn1)[N+](=O)[O-])C)[N+](=O)[O-]
1-Methyl-3,5-dinitro-1,2,4-triazole		5mArN	C3H3N5O4	-32.4	1.726	212.9	106	5.56	7.991	276.1	6050	101	155	n1(nc(nc1[N+](=O)[O-])[N+](=O)[O-])C
5,5'-dinitro-3,3'-bi-1,2,4-triazole		5mArN	C4H2N8O4	-35.4	1.89	425.2	150	4.9	8.115	300.6	5999	224	153	c1([nH]nc(n1)[N+](=O)[O-])c1[nH]nc(n1)[N+](=O)[O-]
4-Nitro-1-picryl-3-picrylaminopyrazole		5mArN	C15H6N10O14	-55.2	1.776	416.4	318	5.43	7.49	246.9	5124	82	149	c1(c(cn(n1)c1c(cc(cc1[N+](=O)[O-])[N+](=O)[O-])[N+](=O)[O-])[N+](=O)[O-])Nc1c(cc(cc1[N+](=O)[O-])[N+](=O)[O-])[N+](=O)[O-]
N,N'-dipicryl-5,5'-dinitro-3,3'-bi-1,2,4-triazole		5mArN	C16H4N14O16	-44.4	1.836	751.4	366	5.59	7.831	275.3	5692	52	138	c1(c2nc(n(n2)c2c(cc(cc2[N+](=O)[O-])[N+](=O)[O-])[N+](=O)[O-])[N+](=O)[O-])nc(n(n1)c1c(cc(cc1[N+](=O)[O-])[N+](=O)[O-])[N+](=O)[O-])[N+](=O)[O-]
5,7-Diamino-4,6-dinitrobenzofuroxan	CL-14	5mArN	C6H4N6O6	-50	1.915	232.2	166	5.22	8.085	300.7	6304	168	120	c1(c(c(c(c2c1no[n+]2[O-])N)[N+](=O)[O-])N)[N+](=O)[O-]
3-amino-4-picrylaminofurazan		5mArN	C8H5N7O7	-59.1	1.771	330.8	196	5.22	7.513	248	5316	119	120	o1nc(c(n1)Nc1c(cc(cc1[N+](=O)[O-])[N+](=O)[O-])[N+](=O)[O-])N
3,5-dinitro-1-methyl-4-picrylpyrazole		5mArN	C10H5N7O10	-52.2	1.751	267.9	219	5.56	7.555	249	5301	79	118	c1c(cc(c(c1[N+](=O)[O-])c1c(nn(c1[N+](=O)[O-])C)[N+](=O)[O-])[N+](=O)[O-])[N+](=O)[O-]
4-nitro-1-picrylpyrazole		5mArN	C9H4N6O8	-59.2	1.735	314.7	187	5.53	7.379	236.2	4994	105	112	c1(c(c(cc(c1)[N+](=O)[O-])[N+](=O)[O-])n1ncc(c1)[N+](=O)[O-])[N+](=O)[O-]
2,4-dinitroimidazole		5mArN	C3H2N4O4	-30.4	1.801	121.2	107	5.35	8.043	287.1	5984	91	105	c1(nc([nH]c1)[N+](=O)[O-])[N+](=O)[O-]
7-Amino-4,6-dinitrobenzofuroxan	ADNBF	5mArN	C6H3N5O6	-49.8	1.877	243.1	150	5.56	7.994	290.6	6202	98	100	c1(cc(c(c2c1no[n+]2[O-])N)[N+](=O)[O-])[N+](=O)[O-]
4-(2,4-dinitrobenzyl)-3,5-dinitro-1,2,4-triazole		5mArN	C9H5N7O8	-59	1.724	355.6	198	5.44	7.4	236.6	5098	112	96	c1(n(c(nn1)[N+](=O)[O-])Cc1c(cc(cc1)[N+](=O)[O-])[N+](=O)[O-])[N+](=O)[O-]
3,5-bis-(picrylamino)-1,2,4-oxadiazole		5mArN	C14H6N10O13	-55.1	1.783	280.2	311	5.1	7.421	242.9	4930	70	95	o1nc(nc1Nc1c(cc(cc1[N+](=O)[O-])[N+](=O)[O-])[N+](=O)[O-])Nc1c(cc(cc1[N+](=O)[O-])[N+](=O)[O-])[N+](=O)[O-]
2,6-Dipicrylbenzo-[1,2-d:4,5-d']-bistriazole-4,8-dione		5mArN	C18H4N12O14	-62.7	1.828	620.6	335	5.11	7.332	240.6	4724	146	95	c1(=O)c2c(c(=O)c3c1nn(n3)c1c(cc(cc1[N+](=O)[O-])[N+](=O)[O-])[N+](=O)[O-])nn(n2)c1c(cc(cc1[N+](=O)[O-])[N+](=O)[O-])[N+](=O)[O-]
1,3,7,9-Tetranitrodibenzo-1,3a,4,6a-tetrazapentalene		5mArN	C12H4N8O8	-74.2	1.791	616.3	210	5.33	7.223	230.8	4786	159	85	n12[n-]c3c([n+]1nc1c2cc(cc1[N+](=O)[O-])[N+](=O)[O-])cc(cc3[N+](=O)[O-])[N+](=O)[O-]
4,6-Dinitrobenzofuroxan	DNBF	5mArN	C6H2N4O6	-49.5	1.838	281.6	133	6.08	7.929	282.3	6111	56	76	c1(cc(cc2c1no[n+]2[O-])[N+](=O)[O-])[N+](=O)[O-]
3,4-bis-(picrylamino)-furazan		5mArN	C14H6N10O13	-55.1	1.783	424.5	311	5.37	7.52	249.4	5199	70	71	o1nc(c(n1)Nc1c(cc(cc1[N+](=O)[O-])[N+](=O)[O-])[N+](=O)[O-])Nc1c(cc(cc1[N+](=O)[O-])[N+](=O)[O-])[N+](=O)[O-]
2,4,5-Trinitroimidazole		5mArN	C3HN5O6	-3.9	1.939	160.3	135	6.05	8.961	372	7658	25	68	c1(nc([nH]c1[N+](=O)[O-])[N+](=O)[O-])[N+](=O)[O-]
3-nitro-1-picryl-1,2,4-triazole		5mArN	C8H3N7O8	-46.7	1.786	365.3	191	5.58	7.712	262.6	5532	63	68	c1(ncn(n1)c1c(cc(cc1[N+](=O)[O-])[N+](=O)[O-])[N+](=O)[O-])[N+](=O)[O-]
3-nitro-4-picrylaminofurazan		5mArN	C8H3N7O9	-39.9	1.824	332.5	208	5.75	7.968	283.8	6010	37	60	o1nc(c(n1)Nc1c(cc(cc1[N+](=O)[O-])[N+](=O)[O-])[N+](=O)[O-])[N+](=O)[O-]
7-Amino-4,5,6-trinitrobenzofuroxan (107140-65-8)	CL-17	5mArN	C6H2N6O8	-28	1.969	319.1	178	6.15	8.713	354.8	7559	37	56	c1(c(c(c(c2c1no[n+]2[O-])N)[N+](=O)[O-])[N+](=O)[O-])[N+](=O)[O-]
8-Amino-7-nitrobenzobisfuroxan (1423364-70-8)	CL-18	5mArN	C6H2N6O6	-44.1	2.019	457.8	150	6.04	8.624	352.4	7607	98	56	c12c(c(c(c3c1no[n+]3[O-])N)[N+](=O)[O-])no[n+]2[O-]
1,4-Dinitroimidazole	19182-81-1	5mArN	C3H2N4O4	-30.4	1.75	208.2	98	5.96	8.098	286	6324	28	55	n1c(cn(c1)[N+](=O)[O-])[N+](=O)[O-]
benzotrifuroxan	BTF	5mArN	C6N6O6	-38.1	2.106	668.9	134	6.8	9.06	398	8734	56	50	c12c3c(c4c(c1[n+](on2)[O-])no[n+]4[O-])no[n+]3[O-]
1-Methyl-2,4,5-trinitroimidazole		5mArN	C4H3N5O6	-25.8	1.775	166.4	131	5.91	8.224	297.5	6495	57	49	c1(c(nc(n1C)[N+](=O)[O-])[N+](=O)[O-])[N+](=O)[O-]
2,4-dinitro-1-picryl-imidazole		5mArN	C9H3N7O10	-41.2	1.83	230.5	224	5.53	7.85	276.1	5681	50	46	c1(nc([nH]c1c1c(cc(cc1[N+](=O)[O-])[N+](=O)[O-])[N+](=O)[O-])[N+](=O)[O-])[N+](=O)[O-]
4,4',5,5'-tetranitrobiimidazole		5mArN	C6H2N8O8	-25.5	1.913	330.4	198	5.57	8.416	325.6	6670	62	37	c1(nc([nH]c1[N+](=O)[O-])c1[nH]c(c(n1)[N+](=O)[O-])[N+](=O)[O-])[N+](=O)[O-]
4-(2-nitroethyl)-3,5-dinitro-1,2,4-triazole		5mArN	C4H4N6O6	-27.6	1.754	228.1	144	5.84	8.21	294.4	6509	57	35	c1(n(c(nn1)[N+](=O)[O-])CC[N+](=O)[O-])[N+](=O)[O-]
3,4-Bis(4-nitro-1,2,5-oxadiazol-3-yl)-1,2,5-oxadiazole-2-oxide	DNTF	5mArN	C6N8O8	-20.5	1.964	707.1	179	6.73	8.915	370.9	8090	15	31	o1nc(c(n1)c1[n+](onc1c1c(non1)[N+](=O)[O-])[O-])[N+](=O)[O-]
3,5-dinitroisoxazole		5mArN	C3HN3O5	-15.1	1.841	107.4	101	6.36	8.528	327	7028	46	29	o1c(cc(n1)[N+](=O)[O-])[N+](=O)[O-]
3-amino-4-nitrofurazan		5mArN	C2H2N4O3	-24.6	1.888	210.5	93	5.79	8.699	345.2	7408	29	27	o1nc(c(n1)N)[N+](=O)[O-]
Compound (24) in PEP 19,249 (1994)		5mArN	C22H18N18O29	-38.5	1.76	208.3	583	5.75	7.956	277	6082	33	27	o1c(nnc1c1c(c(c(c(c1[N+](=O)[O-])NCCO[N+](=O)[O-])[N+](=O)[O-])N(CCO[N+](=O)[O-])[N+](=O)[O-])[N+](=O)[O-])c1c(c(c(c(c1[N+](=O)[O-])N(CCO[N+](=O)[O-])[N+](=O)[O-])[N+](=O)[O-])NCCO[N+](=O)[O-])[N+](=O)[O-]
2,5-dipicryl-1,3,4-oxadiazole		5mArN	C14H4N8O13	-55.3	1.793	274.4	283	5.36	7.425	244	4872	43	20	o1c(nnc1c1c(cc(cc1[N+](=O)[O-])[N+](=O)[O-])[N+](=O)[O-])c1c(cc(cc1[N+](=O)[O-])[N+](=O)[O-])[N+](=O)[O-]
4,4'-dinitro-3,3'-bifurazan		5mArN	C4N6O6	-14	1.937	481.7	139	6.68	8.924	368.7	7992	10	13	o1nc(c(n1)[N+](=O)[O-])c1c(non1)[N+](=O)[O-]
Compound (23) in PEP 19,249 (1994)		5mArN	C18H12N12O19	-52.5	1.744	157.7	413	5.36	7.534	247	5273	59	13	o1c(nnc1c1c(cc(c(c1[N+](=O)[O-])NCCO[N+](=O)[O-])[N+](=O)[O-])[N+](=O)[O-])c1c(c(c(cc1[N+](=O)[O-])[N+](=O)[O-])NCCO[N+](=O)[O-])[N+](=O)[O-]
1,3,5-Triamino-2,4,6-trinitrobenzene	TATB	NAC	C6H6N6O6	-55.8	1.807	7.4	182	4.42	7.507	250.6	5048	285	490	N(=O)(=O)c1c(c(c(c(c1N)N(=O)=O)N)N(=O)=O)N
1,3-diamino-2,4,6-trinitrobenzene	DATB	NAC	C6H5N5O6	-55.9	1.774	2.3	165	4.65	7.419	242	4951	173	320	N(=O)(=O)c1cc(c(c(c1N)N(=O)=O)N)N(=O)=O
1,4-dipicrylpyrazole		NAC	C15H6N8O12	-68.5	1.731	429.9	275	5.41	7.151	221.5	4553	112	314	c1c(cn(n1)c1c(cc(cc1[N+](=O)[O-])[N+](=O)[O-])[N+](=O)[O-])c1c(cc(cc1[N+](=O)[O-])[N+](=O)[O-])[N+](=O)[O-]
1-picrylimidazole		NAC	C9H5N5O6	-83.1	1.647	290.8	158	5.11	6.735	190.5	3982	312	314	c1(c(c(cc(c1)[N+](=O)[O-])[N+](=O)[O-])n1ccnc1)[N+](=O)[O-]
2,4-dinitroresorcinol		NAC	C6H4N2O6	-64	1.779	-291.2	152	4.14	6.964	213.6	3999	293	296	c1c(c(c(c(c1)N(=O)=O)O)N(=O)=O)O
1,3-Dimethoxy-2,4,6-trinitrobenzene		NAC	C8H7N3O8	-67.4	1.615	-206.6	158	5	6.908	197.9	4213	258	251	N(=O)(=O)c1c(c(cc(c1OC)N(=O)=O)N(=O)=O)OC
1-Methyl-3,5-diamino-2,4,6-trinitrobenzene		NAC	C7H7N5O6	-71.6	1.686	23	170	4.63	7.047	211.6	4542	313	239	N(=O)(=O)c1c(c(c(c(c1N)N(=O)=O)N)N(=O)=O)C
5-nitro-2,4,6-tris-(picrylamino)-pyrimidine		NAC	C22H9N15O20	-56.8	1.787	430.6	478	5.09	7.393	241.4	4881	94	201	c1(nc(nc(c1[N+](=O)[O-])Nc1c(cc(cc1[N+](=O)[O-])[N+](=O)[O-])[N+](=O)[O-])Nc1c(cc(cc1[N+](=O)[O-])[N+](=O)[O-])[N+](=O)[O-])Nc1cc(cc(c1[N+](=O)[O-])[N+](=O)[O-])[N+](=O)[O-]
2,4,6-trinitroanisole		NAC	C7H5N3O7	-62.5	1.655	-80.6	146	5.19	7.076	210.9	4442	130	192	O(c1c(cc(cc1N(=O)=O)N(=O)=O)N(=O)=O)C
2,6-bis-(picrylamino)-pyridine		NAC	C17H9N9O12	-79.8	1.689	311	314	4.82	6.771	195.6	3950	225	192	n1c(cccc1Nc1c(cc(cc1[N+](=O)[O-])[N+](=O)[O-])[N+](=O)[O-])Nc1c(cc(cc1[N+](=O)[O-])[N+](=O)[O-])[N+](=O)[O-]
2,4,6-trinitro-m-cresol		NAC	C7H5N3O7	-62.5	1.712	-166	161	4.78	7.095	216.6	4401	134	191	N(=O)(=O)c1c(c(cc(c1C)N(=O)=O)N(=O)=O)O
1-Ethoxy-2,4,6-trinitrobenzene		NAC	C8H7N3O7	-77.8	1.591	-120	152	4.91	6.698	184.2	3945	245	190	N(=O)(=O)c1c(c(cc(c1)N(=O)=O)N(=O)=O)OCC
2,4,6-trinitroaniline	TNA	NAC	C6H4N4O6	-56.1	1.742	14.5	149	4.98	7.353	235.1	4870	101	177	c1(cc(c(c(c1)N(=O)=O)N)N(=O)=O)N(=O)=O
3-Amino-trinitrotoluene		NAC	C7H6N4O6	-72.7	1.658	17.2	153	4.87	6.959	204.2	4396	199	174	c1(c(cc(c(c1[N+](=O)[O-])N)[N+](=O)[O-])[N+](=O)[O-])C
3-Methyl-2,4,6-trinitroaniline		NAC	C7H6N4O6	-72.7	1.658	17.2	153	4.87	6.959	204.2	4396	199	174	c1(c(cc(c(c1[N+](=O)[O-])N)[N+](=O)[O-])[N+](=O)[O-])C
2,4,6-trinitrotoluene	2,4,6-TNT	NAC	C7H5N3O6	-74	1.629	24.3	137	5.2	6.874	197	4204	121	160	N(=O)(=O)c1cc(c(c(c1)N(=O)=O)C)N(=O)=O
3-methyl-2,2',4,4',6,-pentanitrobiphenyl		NAC	C13H7N5O10	-79.3	1.667	154.3	226	5.22	6.816	196.6	4027	124	143	N(=O)(=O)c1c(c(cc(c1)N(=O)=O)N(=O)=O)c1c(c(c(cc1)N(=O)=O)C)N(=O)=O
2,4,6-trinitrobenzonitrile		NAC	C7H2N4O6	-60.5	1.719	239.9	157	5.5	7.19	223	4452	77	140	c1(c(cc(cc1[N+](=O)[O-])[N+](=O)[O-])[N+](=O)[O-])C#N
2,4,6-trinitro-3-aminophenol		NAC	C6H4N4O7	-45.9	1.835	-159.3	173	4.65	7.608	259.7	5089	115	138	Nc1c(cc(c(c1N(=O)=O)O)N(=O)=O)N(=O)=O
3,3'-dimethyl-2,2',4,4',6,6'-hexanitrobiphenyl		NAC	C14H8N6O12	-70.8	1.688	142.5	258	5.36	7.058	212.4	4470	96	135	Cc1c(cc(c(c1N(=O)=O)c1c(c(c(cc1N(=O)=O)N(=O)=O)C)N(=O)=O)N(=O)=O)N(=O)=O
3,3'-Diamino-2,2',4,4',6,6'-hexanitrobiphenyl	DIPAM	NAC	C12H6N8O12	-52.8	1.812	149.2	283	5.2	7.596	256.9	5294	79	132	c1(cc(c(c(c1c1c(cc(c(c1[N+](=O)[O-])N)[N+](=O)[O-])[N+](=O)[O-])[N+](=O)[O-])N)[N+](=O)[O-])[N+](=O)[O-]
3,3'-diamino-2,2',4,4',6,6'-hexanitrobiphenyl	DIPAM	NAC	C12H7N9O12	-52.9	1.806	162.1	297	5.08	7.592	256.2	5295	100	132	N(c1c(c(c(cc1N(=O)=O)N(=O)=O)N)N(=O)=O)c1c(cc(c(c1N(=O)=O)N)N(=O)=O)N(=O)=O
1-hydroxy-3,5-diamino-2,4,6-trinitrobenzene		NAC	C6H5N5O7	-46.3	1.867	-168.6	189	4.37	7.672	266.8	5137	192	120	Oc1c(c(c(c(c1N(=O)=O)N)N(=O)=O)N)N(=O)=O
2,2',4,4',6,6'-hexanitrobibenzyl		NAC	C14H8N6O12	-70.8	1.688	116.9	264	5.29	7.035	211.1	4413	96	114	C(c1c(cc(cc1N(=O)=O)N(=O)=O)N(=O)=O)Cc1c(cc(cc1N(=O)=O)N(=O)=O)N(=O)=O
Trinitromesitylene		NAC	C9H9N3O6	-103.5	1.512	-11.2	145	4.81	6.22	153.6	3463	431	110	c1(c(c(c(c(c1[N+](=O)[O-])C)[N+](=O)[O-])C)[N+](=O)[O-])C
2,4,6-trinitrobenzoic acid		NAC	C7H3N3O8	-46.7	1.801	-293.2	174	4.57	7.3	236.5	4396	92	109	N(=O)(=O)c1c(c(cc(c1)N(=O)=O)N(=O)=O)C(=O)O
3,4,5-Trinitrotoluene	3,4,5-TNT	NAC	C7H5N3O6	-74	1.629	61.4	137	5.36	6.927	200.1	4336	121	107	c1(cc(c(c(c1)[N+](=O)[O-])[N+](=O)[O-])[N+](=O)[O-])C
1-Picryl-2-picrylamino-1,2-dihydropyrimidine		NAC	C16H9N9O12	-75.5	1.69	453.2	292	5.25	6.998	209	4440	200	106	N1(C=CC=NC1Nc1c(cc(cc1[N+](=O)[O-])[N+](=O)[O-])[N+](=O)[O-])c1c(cc(cc1[N+](=O)[O-])[N+](=O)[O-])[N+](=O)[O-]
1,3,5-trinitrobenzene	TNB	NAC	C6H3N3O6	-56.3	1.709	31.5	133	5.38	7.274	227.4	4688	57	100	c1(cc(cc(c1)N(=O)=O)N(=O)=O)N(=O)=O
1,4,5,8-tetranitronaphthalene		NAC	C10H4N4O8	-72.7	1.728	188.6	182	5.42	7.053	215.3	4342	86	100	c1(ccc(c2c1c(ccc2[N+](=O)[O-])[N+](=O)[O-])[N+](=O)[O-])[N+](=O)[O-]
Trinitroxylene		NAC	C8H7N3O6	-89.6	1.565	7.4	141	4.99	6.524	172.9	3796	237	100	c1(c(cc(c(c1[N+](=O)[O-])C)[N+](=O)[O-])[N+](=O)[O-])C
3,5-bis-(picrylamino)-2,6-dinitropyridine		NAC	C17H7N11O16	-55.4	1.781	359.8	371	5.3	7.461	245.3	5038	78	92	n1c(c(cc(c1[N+](=O)[O-])Nc1c(cc(cc1[N+](=O)[O-])[N+](=O)[O-])[N+](=O)[O-])Nc1c(cc(cc1[N+](=O)[O-])[N+](=O)[O-])[N+](=O)[O-])[N+](=O)[O-]
4,6-Dinitro-1-picryl-benzotriazole		NAC	C13H5N7O10	-70.6	1.744	317.1	236	5.16	7.069	217.5	4367	127	91	c1(cc(cc2c1ncn2c1c(cc(cc1[N+](=O)[O-])[N+](=O)[O-])[N+](=O)[O-])[N+](=O)[O-])[N+](=O)[O-]
Methyl-2,4,6-trinitrobenzoate		NAC	C8H5N3O8	-62	1.667	-287.5	163	4.56	6.833	197.6	3808	176	90	C(=O)(c1c(cc(cc1N(=O)=O)N(=O)=O)N(=O)=O)OC
1,3,5-trinitro-2,4,6-tripicryl benzene (BRX)		NAC	C24H6N12O24	-51	1.816	462.8	484	5.71	7.623	259.1	5251	37	89	c1(c(c(c(c(c1c1c(cc(cc1[N+](=O)[O-])[N+](=O)[O-])[N+](=O)[O-])[N+](=O)[O-])c1c(cc(cc1[N+](=O)[O-])[N+](=O)[O-])[N+](=O)[O-])[N+](=O)[O-])c1c(cc(cc1[N+](=O)[O-])[N+](=O)[O-])[N+](=O)[O-])[N+](=O)[O-]
picric acid	PA	NAC	C6H3N3O7	-45.4	1.802	-146.5	157	4.98	7.532	251.9	4967	67	87	N(=O)(=O)c1c(c(cc(c1)N(=O)=O)N(=O)=O)O
2,2',4,4',6,6'-hexanitrobiphenyl	HNBP	NAC	C12H4N6O12	-52.8	1.779	170.1	250	5.59	7.5	247.8	5047	43	85	N(=O)(=O)c1c(c(cc(c1)N(=O)=O)N(=O)=O)c1c(cc(cc1N(=O)=O)N(=O)=O)N(=O)=O
Tripicryl-s-triazine		NAC	C21H6N12O18	-60.5	1.787	514.9	412	5.29	7.316	236.4	4702	77	85	n1c(nc(nc1c1c(cc(cc1[N+](=O)[O-])[N+](=O)[O-])[N+](=O)[O-])c1c(cc(cc1[N+](=O)[O-])[N+](=O)[O-])[N+](=O)[O-])c1c(cc(cc1[N+](=O)[O-])[N+](=O)[O-])[N+](=O)[O-]
2,4,6-Trinitro-1-chlorobenzene		NAC	C6H2N3O6Cl	-42	1.807	60.5	140	4.91	7.404	243.8	4507	54	79	N(=O)(=O)c1cc(c(c(c1)N(=O)=O)Cl)N(=O)=O
2,4,6-Trinitro-acetylbenzene		NAC	C8H5N3O7	-72.1	1.645	-89.6	154	4.88	6.774	192.5	3866	164	79	c1c(c(c(cc1N(=O)=O)N(=O)=O)C(=O)C)N(=O)=O
3,5-dimethyl-2,4,6-trinitrophenol		NAC	C8H7N3O7	-77.8	1.639	-169.8	165	4.67	6.747	190.6	4005	245	77	Oc1c(c(c(c(c1N(=O)=O)C)N(=O)=O)C)N(=O)=O
1-Methoxy-3,5-dichloro-2,4,6-trinitrobenzene		NAC	C7H3N3O7Cl2	-38.5	1.819	-63.1	159	4.37	7.253	234.8	4071	121	75	N(=O)(=O)c1c(c(c(c(c1Cl)N(=O)=O)OC)N(=O)=O)Cl
2-(2,4,6-Trinitrobenzene) ethanol		NAC	C8H7N3O7	-77.8	1.639	-145.5	170	4.74	6.774	192.1	4068	155	68	N(=O)(=O)c1c(c(cc(c1)N(=O)=O)N(=O)=O)CCO
2,6-bis-(picrylamino)-3,5-dinitropyridine		NAC	C17H7N11O16	-55.4	1.781	320.6	371	5.24	7.438	243.9	4978	78	63	n1c(c(cc(c1Nc1c(cc(cc1[N+](=O)[O-])[N+](=O)[O-])[N+](=O)[O-])[N+](=O)[O-])[N+](=O)[O-])Nc1c(cc(cc1[N+](=O)[O-])[N+](=O)[O-])[N+](=O)[O-]
2,2",4,4',4",6,6',6"-octanitro-m-terphenyl		NAC	C18H6N8O16	-62.3	1.762	279.3	339	5.46	7.267	231.3	4631	57	63	c1c(c(cc(c1[N+](=O)[O-])c1c(cc(cc1[N+](=O)[O-])[N+](=O)[O-])[N+](=O)[O-])c1c(cc(cc1[N+](=O)[O-])[N+](=O)[O-])[N+](=O)[O-])[N+](=O)[O-]
3,6-bis-(pricrylamino)-s-tetrazine		NAC	C14H6N12O12	-56.9	1.783	663.9	327	5.3	7.507	248.6	5213	163	61	c1(nnc(nn1)Nc1c(cc(cc1[N+](=O)[O-])[N+](=O)[O-])[N+](=O)[O-])Nc1c(cc(cc1[N+](=O)[O-])[N+](=O)[O-])[N+](=O)[O-]
2,2',2",4,4",6,6',6"-octanitro-p-terphenyl		NAC	C18H6N8O16	-62.3	1.762	289.9	339	5.48	7.274	231.7	4647	57	59	c1(cc(cc(c1c1c(cc(cc1[N+](=O)[O-])[N+](=O)[O-])[N+](=O)[O-])[N+](=O)[O-])c1c(cc(cc1[N+](=O)[O-])[N+](=O)[O-])[N+](=O)[O-])[N+](=O)[O-]
2,4,6,2',2",4",6"-heptanitro-4',6'-diaza-m-terphenyl		NAC	C16H5N9O14	-59.9	1.776	392.6	319	5.37	7.334	236.7	4761	73	58	c1nc(c(c(n1)c1c(cc(cc1[N+](=O)[O-])[N+](=O)[O-])[N+](=O)[O-])[N+](=O)[O-])c1c(cc(cc1[N+](=O)[O-])[N+](=O)[O-])[N+](=O)[O-]
2,4,6,4',2",4",6"-heptanitro-2',6'-diaza-m-terphenyl		NAC	C16H5N9O14	-59.9	1.776	374.1	319	5.34	7.322	235.9	4731	73	58	c1nc(nc(c1[N+](=O)[O-])c1c(cc(cc1[N+](=O)[O-])[N+](=O)[O-])[N+](=O)[O-])c1c(cc(cc1[N+](=O)[O-])[N+](=O)[O-])[N+](=O)[O-]
3,3',5,5'-tetranitro-2,2'-azopyridine		NAC	C10H4N8O8	-61.5	1.731	534.9	221	5.43	7.317	231.9	4890	185	56	N(=N\c1ncc(cc1[N+](=O)[O-])[N+](=O)[O-])/c1ncc(cc1[N+](=O)[O-])[N+](=O)[O-]
2,3,4-Trinitrotoluene	2,3,4-TNT	NAC	C7H5N3O6	-74	1.629	67	137	5.39	6.936	200.6	4357	121	56	c1(ccc(c(c1[N+](=O)[O-])[N+](=O)[O-])[N+](=O)[O-])C
2,2',4,4',6,-pentanitrobenzophenone		NAC	C13H5N5O11	-68.8	1.719	54.1	239	5.14	6.968	209.4	4059	97	54	O=C(c1c(cc(cc1[N+](=O)[O-])[N+](=O)[O-])[N+](=O)[O-])c1ccc(cc1[N+](=O)[O-])[N+](=O)[O-]
3-methyl-2,2',4,4',6,6'-hexanitrobiphenyl		NAC	C13H6N6O12	-62.1	1.731	153.9	254	5.47	7.267	228.8	4736	65	53	c1(c2c(c(c(cc2N(=O)=O)N(=O)=O)C)N(=O)=O)c(cc(cc1N(=O)=O)N(=O)=O)N(=O)=O
2,4,6-Trinitrobenzyl alcohol		NAC	C7H5N3O7	-62.5	1.712	-116.9	164	4.97	7.164	220.8	4575	75	52	c1c(cc(c(c1[N+](=O)[O-])CO)[N+](=O)[O-])[N+](=O)[O-]
2,4,6-Trinitrobenzylalcohol		NAC	C7H5N3O7	-62.5	1.712	-116.9	164	4.97	7.164	220.8	4575	130	52	c1c(cc(c(c1[N+](=O)[O-])CO)[N+](=O)[O-])[N+](=O)[O-]
2,2',4,4',6,6'-hexanitrobiphenylamine		NAC	C12H5N7O12	-52.8	1.772	189.2	264	5.46	7.506	247.6	5116	57	48	N(=O)(=O)c1c(c(cc(c1)N(=O)=O)N(=O)=O)Nc1c(cc(cc1N(=O)=O)N(=O)=O)N(=O)=O
4-Amino-2,3,5,6-tetranitrotoluene	TetN-p-Tol	NAC	C7H5N5O8	-47.4	1.763	81.8	182	5.53	7.736	262.2	5671	69	47	c1(c(c(c(c(c1[N+](=O)[O-])[N+](=O)[O-])N)[N+](=O)[O-])[N+](=O)[O-])C
2,4,6-Trinitrobenzyl chloride		NAC	C7H4N3O6Cl	-58.1	1.724	13.6	147	4.62	6.975	210.2	3947	75	44	C(c1c(cc(cc1N(=O)=O)N(=O)=O)N(=O)=O)Cl
2,4,6-trinitroresorcinol		NAC	C6H3N3O8	-35.9	1.897	-315.2	181	4.67	7.8	278.3	5240	76	43	c1c(c(c(c(c1N(=O)=O)O)N(=O)=O)O)N(=O)=O
3-hydroxy-2,2',4,4',6,6'-hexanitrobiphenyl		NAC	C12H4N6O13	-47.3	1.828	-1.9	274	5.39	7.646	261.7	5239	47	42	N(=O)(=O)c1c(c(c(c(c1)N(=O)=O)O)N(=O)=O)c1c(cc(cc1N(=O)=O)N(=O)=O)N(=O)=O
2,4,6-trinitrobenzaldoxime		NAC	C7H4N4O7	-56.2	1.731	115	172	5.51	7.438	239.6	5113	132	42	c1(cc(cc(c1/C=N/O)[N+](=O)[O-])[N+](=O)[O-])[N+](=O)[O-]
2,3,4,6-tetranitroaniline	TetNA	NAC	C6H3N5O8	-32.2	1.848	86.1	178	5.67	8.15	299.3	6274	37	41	N(=O)(=O)c1c(c(c(c(c1)N(=O)=O)N(=O)=O)N(=O)=O)N
3,3'-dihydroxy-2,2',4,4',6,6'-hexanitrobiphenyl		NAC	C12H4N6O14	-42.1	1.877	-173.4	298	5.2	7.789	275.8	5411	52	40	N(=O)(=O)c1cc(c(c(c1O)N(=O)=O)c1c(c(c(cc1N(=O)=O)N(=O)=O)O)N(=O)=O)N(=O)=O
azo-bis-2,2',4,4',6,6'-hexanitrobiphenyl		NAC	C24H6N14O24	-49.4	1.814	714.6	504	5.8	7.692	263.7	5430	44	40	N(=N\c1c(c(c(cc1[N+](=O)[O-])[N+](=O)[O-])c1c(cc(cc1[N+](=O)[O-])[N+](=O)[O-])[N+](=O)[O-])[N+](=O)[O-])/c1c(c(c(cc1[N+](=O)[O-])[N+](=O)[O-])c1c(cc(cc1[N+](=O)[O-])[N+](=O)[O-])[N+](=O)[O-])[N+](=O)[O-]
dodecanitroquaterphenyl		NAC	C24H6N12O24	-51	1.816	451	484	5.7	7.618	258.8	5238	37	40	c1(cc(c(c(c1c1c(cc(cc1[N+](=O)[O-])[N+](=O)[O-])[N+](=O)[O-])[N+](=O)[O-])c1c(c(c(cc1[N+](=O)[O-])[N+](=O)[O-])c1c(cc(cc1[N+](=O)[O-])[N+](=O)[O-])[N+](=O)[O-])[N+](=O)[O-])[N+](=O)[O-])[N+](=O)[O-]
2,2',2",4,4",5',6,6"-octanitro-p-terphenyl		NAC	C18H6N8O16	-62.3	1.762	279.6	339	5.46	7.268	231.3	4632	57	40	c1c(c(cc(c1c1c(cc(cc1[N+](=O)[O-])[N+](=O)[O-])[N+](=O)[O-])[N+](=O)[O-])c1c(cc(cc1[N+](=O)[O-])[N+](=O)[O-])[N+](=O)[O-])[N+](=O)[O-]
2,2',2",4,4',4",6,6',6"-nonanitro-m-terphenyl		NAC	C18H5N9O18	-51.6	1.804	309.7	367	5.66	7.58	255.2	5176	39	39	c1c(c(c(c(c1[N+](=O)[O-])c1c(cc(cc1[N+](=O)[O-])[N+](=O)[O-])[N+](=O)[O-])[N+](=O)[O-])c1c(cc(cc1[N+](=O)[O-])[N+](=O)[O-])[N+](=O)[O-])[N+](=O)[O-]
2,2',4,4',6,6'-Hexanitrodiphenylmethane	HNDPM	NAC	C13H6N6O12	-62.1	1.731	153.6	257	5.46	7.265	228.6	4730	65	39	C(c1c(cc(cc1[N+](=O)[O-])[N+](=O)[O-])[N+](=O)[O-])c1c(cc(cc1[N+](=O)[O-])[N+](=O)[O-])[N+](=O)[O-]
hexanitrostilbene	HNS	NAC	C14H6N6O12	-67.5	1.705	247.5	261	5.51	7.11	216.9	4439	75	39	c1(cc(cc(c1/C=C/c1c(cc(cc1[N+](=O)[O-])[N+](=O)[O-])[N+](=O)[O-])[N+](=O)[O-])[N+](=O)[O-])[N+](=O)[O-]
3-Amino-2,4,5,6-tetranitrotoluene	TetN-m-Tol	NAC	C7H5N5O8	-47.4	1.763	83.8	182	5.53	7.738	262.3	5678	69	37	c1(c(c(c(c(c1[N+](=O)[O-])N)[N+](=O)[O-])[N+](=O)[O-])[N+](=O)[O-])C
2,2,4,4,6,6-Hexanitroazobenzene		NAC	C12H4N8O12	-49.5	1.777	450.3	270	5.82	7.659	258.2	5444	58	37	N(=N\c1c(cc(cc1[N+](=O)[O-])[N+](=O)[O-])[N+](=O)[O-])/c1c(cc(cc1[N+](=O)[O-])[N+](=O)[O-])[N+](=O)[O-]
2-Amino-3,4,5,6-tetranitrotoluene	TetN-o-Tol	NAC	C7H5N5O8	-47.4	1.763	98.1	182	5.58	7.755	263.5	5728	69	36	c1(c(c(c(c(c1N)[N+](=O)[O-])[N+](=O)[O-])[N+](=O)[O-])[N+](=O)[O-])C
2,4,6-trinitrobenzaldehyde		NAC	C7H3N3O7	-56.4	1.717	-37.2	150	5.22	7.183	222.4	4407	82	36	c1(cc(cc(c1C=O)[N+](=O)[O-])[N+](=O)[O-])[N+](=O)[O-]
2,6-bis-(picrylazo)-3,5-dinitropyridine		NAC	C17H5N13O16	-50.7	1.787	865.9	382	5.79	7.668	259.7	5481	80	33	n1c(c(cc(c1/N=N/c1c(cc(cc1[N+](=O)[O-])[N+](=O)[O-])[N+](=O)[O-])[N+](=O)[O-])[N+](=O)[O-])/N=N/c1c(cc(cc1[N+](=O)[O-])[N+](=O)[O-])[N+](=O)[O-]
2,4,6-Trinitrostyrene		NAC	C8H5N3O6	-83.6	1.598	149.9	141	5.45	6.691	184.3	3900	155	32	c1(cc(cc(c1C=C)[N+](=O)[O-])[N+](=O)[O-])[N+](=O)[O-]
1,2,4,5-tetranitrobenzene	TetNB	NAC	C6H2N4O8	-31	1.817	111	161	6.08	8.097	292.5	6189	23	27	N(=O)(=O)c1cc(c(cc1N(=O)=O)N(=O)=O)N(=O)=O
2,4,6-trinitrophloroglucinol		NAC	C6H3N3O9	-27.6	1.992	-500.6	204	4.34	8.028	303.1	5386	82	27	N(=O)(=O)c1c(c(c(c(c1O)N(=O)=O)O)N(=O)=O)O
2,3,5,6-Tetranitrotoluene	2,3,5,6-TetNT	NAC	C7H4N4O8	-47	1.737	78.7	165	5.8	7.66	254.7	5505	45	25	c1(c(c(cc(c1[N+](=O)[O-])[N+](=O)[O-])[N+](=O)[O-])[N+](=O)[O-])C
4,4'-Diamino-2,2',3,3',4,4',5,5',6,6'-octanitrobiphenyl	CL-12	NAC	C12H4N10O16	-29.4	1.915	314.3	340	5.9	8.401	324.6	6788	30	20	c1(c(c(c(c(c1c1c(c(c(c(c1[N+](=O)[O-])[N+](=O)[O-])N)[N+](=O)[O-])[N+](=O)[O-])[N+](=O)[O-])[N+](=O)[O-])N)[N+](=O)[O-])[N+](=O)[O-]
2,4,6-trinitropyridine-1-oxide		NAC	C5H2N4O7	-27.8	1.84	175.1	144	6.32	8.348	313.2	6818	49	20	[n+]1(c(cc(cc1[N+](=O)[O-])[N+](=O)[O-])[N+](=O)[O-])[O-]
2,3,4,6-Tetranitrotoluene	2,3,4,6-TetNT	NAC	C7H4N4O8	-47	1.737	84.9	165	5.82	7.667	255.2	5526	45	19	c1(c(cc(c(c1[N+](=O)[O-])[N+](=O)[O-])[N+](=O)[O-])[N+](=O)[O-])C
Pentanitrotoluene	PNT	NAC	C7H3N5O10	-27.7	1.822	143.7	194	6.26	8.268	305.4	6615	23	18	c1(c(c(c(c(c1[N+](=O)[O-])[N+](=O)[O-])[N+](=O)[O-])[N+](=O)[O-])[N+](=O)[O-])C
pentanitroaniline	PNA	NAC	C6H2N6O10	-15.1	1.932	159.6	206	6.18	8.762	354.9	7454	19	15	Nc1c(c(c(c(c1N(=O)=O)N(=O)=O)N(=O)=O)N(=O)=O)N(=O)=O
2,3,4,5-Tetranitrotoluene	2,3,4,5-TetNT	NAC	C7H4N4O8	-47	1.737	96.6	165	5.87	7.682	256.2	5568	45	15	c1(cc(c(c(c1[N+](=O)[O-])[N+](=O)[O-])[N+](=O)[O-])[N+](=O)[O-])C
hexanitrobenzene	HNB	NAC	C6N6O12	0	1.971	235.6	218	6.83	9.172	393.3	8321	8	12	N(=O)(=O)c1c(c(c(c(c1N(=O)=O)N(=O)=O)N(=O)=O)N(=O)=O)N(=O)=O
Pentanitrobenzene	PNB	NAC	C6HN5O10	-13.2	1.902	168.5	190	6.49	8.692	346.1	7333	12	11	c1c(c(c(c(c1[N+](=O)[O-])[N+](=O)[O-])[N+](=O)[O-])[N+](=O)[O-])[N+](=O)[O-]

## Sheet: Table S3
Table S3. Formation enthalpies for F-/Cl-containing compounds in gas phase
Complement to the data for CHNO compounds compiled by Elioff et al. (http://dx.doi.org/10.1155/2016/5082084)
Content of the columns:
Name = chemical name of the molecule
CASRN = CAS Registry Number
HGAS = Experimental formation enthalpy (kJ/mol) taken from the NIST Webbook database (http://webbook.nist.gov/chemistry/)
Name	CASRN	expe(kJ/mol)
Chlorobenzene	108-90-7	54.42
Difluorodinitromethane	1185-11-1	-403
Pentafluoronitrosobenzene	1423-13-8	-669
1,1,2-Trifluorotrinitroethane	20165-38-2	-601
1,2-Difluorotetranitroethane	20165-39-3	-352
Fluoropentanitroethane	23072-51-7	-86.2
1-Chloro-1,1-dinitroethane	2972-95-4	-113
1-Chloro-1,1,3,3-tetranitrobutane	2972-98-7	-141
1,1,2,2-Tetrafluoro-1,2-dinitroethane	356-16-1	-812
1,2-Difluorobenzene	367-11-3	-283
1,3-Difluorobenzene	372-18-9	-309.2
1,1,1-Trifluoroethane	420-46-2	-748.7
Methyl fluoride	593-53-3	-234.3
1,1-Dichloro-1-nitropropane	595-44-8	-168
Chloroethene	75-01-4	22
1,1-Dichloroethane	75-34-3	-132.5
Trichloroethylene	79-01-6	-18
